# Supplementary material for: Strategic design of a 2,6-disubstituted pyridine-based probe having hard-soft centers: responsive divergence from one core
Source: Royal Society of Chemistry journal article supplement (doi:10.1039/d2nj02246j), 2022-01-01
Supplement: d2nj02246j1.pdf [file d2nj02246j1.pdf]

# Supporting Information

*for*

## Strategic Design of a 2,6-Disubstituted Pyridine-based Probe having Hard-Soft Centres: Responsive Divergence from One Core

Krishna Mohan Das,<sup>a‡</sup> Adwitiya Pal,<sup>a‡</sup> Bappaditya Goswami,<sup>b</sup> Nayarassery N. Adarsh,<sup>c</sup>  
Arunabha Thakur<sup>\*a</sup>

<sup>a</sup>Department of Chemistry, Jadavpur University, Kolkata- 700032, India.

<sup>b</sup>Department of Chemical Sciences, Indian Institute of Science Education and Research  
Kolkata, Mohanpur-741246, India.

<sup>c</sup>Chemistry and Biomolecular Science, Clarkson University, 8 Clarkson Ave., Potsdam, New  
York, 13699.

<sup>‡</sup>These authors contributed equally to the publication.

Phone : 0332-4572779, +919937760940.

Email: [arunabha.thakur@jadavpuruniversity.in](mailto:arunabha.thakur@jadavpuruniversity.in), [babuiitm07@gmail.com](mailto:babuiitm07@gmail.com)

| Contents                                                                   | Page |
|----------------------------------------------------------------------------|------|
| <b>Fig. S1.</b> <sup>1</sup> H NMR spectra of compound <b>5</b>            | 5    |
| <b>Fig. S2.</b> <sup>13</sup> C NMR spectra of compound <b>5</b>           | 6    |
| <b>Fig. S3.</b> <sup>1</sup> H NMR spectra of compound <b>6</b>            | 7    |
| <b>Fig. S4.</b> <sup>13</sup> C NMR spectra of compound <b>6</b>           | 8    |
| <b>Fig. S5.</b> <sup>1</sup> H NMR spectra of compound <b>7</b>            | 9    |
| <b>Fig. S6.</b> <sup>13</sup> C NMR spectra of compound <b>7</b>           | 10   |
| <b>Fig. S7</b> ORTEP representation of the molecular structure of <b>5</b> | 11   |
| <b>Table S1.</b> Crystal data of <b>5</b>                                  | 12   |

|                                                                                                                                                                    |    |
|--------------------------------------------------------------------------------------------------------------------------------------------------------------------|----|
| <b>Fig. S8.</b> Absorption spectra of compound <b>5</b> with all metals in DMSO:H <sub>2</sub> O (7:3, v/v) at 22 °C.                                              | 13 |
| <b>Fig. S9.</b> Absorption spectra of compound <b>7</b> with all metals in DMSO:H <sub>2</sub> O (7:3, v/v) at 22 °C.                                              | 14 |
| <b>Fig. S10.</b> Binding plots by Bindfit software of compound <b>5</b> with Hg <sup>2+</sup> ion from UV-vis titration spectra.                                   | 15 |
| <b>Fig. S11.</b> Jobs plot of compound <b>5</b> with Cu <sup>2+</sup> metal ion at various concentration.                                                          | 16 |
| <b>Fig. S12.</b> Jobs plot of compound <b>7</b> with Cu <sup>2+</sup> and Hg <sup>2+</sup> metal ions at various concentration                                     | 17 |
| <b>Fig. S13.</b> Binding plots by Bindfit software of compound <b>5</b> with Cu <sup>2+</sup> ion from UV-vis titration spectra                                    | 18 |
| <b>Fig. S14.</b> Binding plots by Bindfit software of compound <b>7</b> with Cu <sup>2+</sup> ion from UV-vis titration spectra                                    | 19 |
| <b>Fig. S15.</b> Binding plots by Bindfit software of compound <b>7</b> with Hg <sup>2+</sup> ion from UV-vis titration spectra                                    | 20 |
| <b>Fig. S16</b> Fluorescence emission spectra of compound <b>5</b> ( $7.8 \times 10^{-6}$ M) with all metals in DMSO:H <sub>2</sub> O (7:3, v/v) solvent at 22 °C. | 21 |
| <b>Fig. S17</b> Fluorescence emission spectra of compound <b>7</b> ( $7.8 \times 10^{-6}$ M) with all metals in DMSO:H <sub>2</sub> O (7:3, v/v) solvent at 22 °C. | 22 |
| <b>Fig. S18</b> Stern-Volmer plot of <b>5</b> +Cu <sup>2+</sup> .                                                                                                  | 23 |
| <b>Fig. S19</b> Stern-Volmer plot of <b>7</b> +Cu <sup>2+</sup> .                                                                                                  | 24 |
| <b>Fig. S20</b> Stern-Volmer plot of <b>7</b> +Hg <sup>2+</sup> .                                                                                                  | 25 |
| <b>Fig. S21.</b> Limit of detection (LOD) of compound <b>5</b> in presence of Cu <sup>2+</sup> ion from fluorescence spectra by 3σ/s method.                       | 26 |
| <b>Fig. S22</b> Excel sheet for <b>5</b> +Cu <sup>2+</sup> LOD calculation.                                                                                        | 27 |
| <b>Fig. S23.</b> Limit of detection (LOD) of compound <b>7</b> in presence of Cu <sup>2+</sup> ion from fluorescence spectra by 3σ/s method.                       | 28 |
| <b>Fig. S24</b> Excel sheet for <b>7</b> +Cu <sup>2+</sup> LOD calculation.                                                                                        | 29 |
| <b>Fig. S25.</b> Limit of detection (LOD) of compound <b>7</b> in presence of Hg <sup>2+</sup> ion from fluorescence spectra by 3σ/s method.                       | 30 |
| <b>Fig. S26.</b> Excel sheet for <b>7</b> +Hg <sup>2+</sup> LOD calculation.                                                                                       | 31 |

|                                                                                                                                                                                                                                                  |    |
|--------------------------------------------------------------------------------------------------------------------------------------------------------------------------------------------------------------------------------------------------|----|
| <b>Fig. S27.</b> Quantitative binding data for <b>5</b> with Cu <sup>2+</sup> ion.                                                                                                                                                               | 32 |
| <b>Fig. S28.</b> Quantitative binding data for <b>7</b> with Cu <sup>2+</sup> ion.                                                                                                                                                               | 33 |
| <b>Fig. S29.</b> Quantitative binding data for <b>7</b> with Hg <sup>2+</sup> ion.                                                                                                                                                               | 34 |
| <b>Table S2.</b> Comparison table for LOD and association constant                                                                                                                                                                               | 35 |
| <b>Fig. S30.</b> Reversibility test of <b>5</b> with Cu <sup>2+</sup> in DMSO:H <sub>2</sub> O (7:3, v/v) by aqueous solution of disodium EDTA.                                                                                                  | 37 |
| <b>Fig. S31.</b> Reversibility test of <b>7</b> with Cu <sup>2+</sup> in DMSO:H <sub>2</sub> O (7:3, v/v) by aqueous solution of disodium EDTA.                                                                                                  | 38 |
| <b>Fig. S32.</b> Reversibility test of <b>7</b> with Hg <sup>2+</sup> in DMSO:H <sub>2</sub> O (7:3, v/v) by aqueous solution of disodium EDTA.                                                                                                  | 39 |
| <b>Fig. S33.</b> <sup>1</sup> H NMR titration of ligand <b>5</b> with Cu <sup>2+</sup> ion.                                                                                                                                                      | 40 |
| <b>Fig. S34.</b> <sup>1</sup> H NMR titration of ligand <b>7</b> with Hg <sup>2+</sup> ion.                                                                                                                                                      | 41 |
| <b>Fig. S35.</b> Naked eye detection of Hg <sup>2+</sup> and Cu <sup>2+</sup> by <b>5</b> and <b>7</b> (10 <sup>-3</sup> M) in DMSO solvent.                                                                                                     | 42 |
| <b>Fig. S36.</b> Variation of fluorescence intensity with pH                                                                                                                                                                                     | 43 |
| <b>Fig. S37.</b> Variation of fluorescence intensity with temperature and time                                                                                                                                                                   | 44 |
| <b>Fig. S38</b> Overlay of X-ray crystal structure and DFT optimized structure of receptor <b>5</b> .                                                                                                                                            | 45 |
| <b>Table S3</b> The selected distances (Å) of receptors <b>5</b> and <b>7</b> calculated at B3LYP/6-311g(d)/cpcm (acetonitrile) level.                                                                                                           | 46 |
| <b>Fig. S39</b> Frontiers MOs of the acyclic receptor <b>5</b> with corresponding energy values in parenthesis. (isosurface value= 0.04)                                                                                                         | 47 |
| <b>Fig. S40</b> Frontiers MOs of the cyclic receptor <b>7</b> with corresponding energy values in parenthesis. (isosurface value=0.04)                                                                                                           | 48 |
| <b>Table S4</b> The selected distances (Å) of complex [ <b>5</b> ·Cu(ClO <sub>4</sub> ) <sub>2</sub> ] calculated at B3LYP/6-311g(d)/lanl2dz(Cu)/cpcm(acetonitrile) level.                                                                       | 49 |
| <b>Fig. S41</b> Frontiers MOs of the complex [ <b>5</b> ·Cu(ClO <sub>4</sub> ) <sub>2</sub> ] with corresponding energy values in parenthesis. (isosurface value= 0.04)                                                                          | 50 |
| <b>Table S5</b> The selected distances (Å) of complexes [ <b>7</b> ·Hg <sup>2+</sup> ] (left sided alkyne unit) and [ <b>7</b> ·Hg <sup>2+</sup> ] (left sided alkyne unit) calculated at B3LYP/6-311g(d)/lanl2dz(Hg)/cpcm (acetonitrile) level. | 51 |
| <b>Fig. S42</b> Frontiers MOs of the complex [ <b>7</b> ·Hg <sup>2+</sup> ] (left sided alkyne unit) with corresponding energy values in parenthesis (isosurface value= 0.04).                                                                   | 52 |
| <b>Fig. S43</b> Frontiers MOs of the complex [ <b>7</b> ·Hg <sup>2+</sup> ] (right sided alkyne unit) with                                                                                                                                       |    |

|                                                                                                                                                                                                                                   |    |
|-----------------------------------------------------------------------------------------------------------------------------------------------------------------------------------------------------------------------------------|----|
| corresponding energy values in parenthesis (isosurface value= 0.04).                                                                                                                                                              | 53 |
| <b>Fig. S44</b> Optimized structure of the complexes considering endocyclic binding mode: <b>a</b> ) [ $7 \cdot \text{Hg}^{2+}$ ] (left sided alkyne unit), and <b>b</b> ) [ $7 \cdot \text{Hg}^{2+}$ ] (right sided alkyne unit) | 54 |
| <b>Fig. S45</b> Calculated absorption spectrum of the acyclic receptor <b>5</b>                                                                                                                                                   | 55 |
| <b>Table S6</b> Major excited state transitions of the acyclic receptor <b>5</b> with Osc. Strength and $\lambda_{\text{ex}}$ .                                                                                                   | 55 |
| <b>Fig. S46</b> Calculated absorption spectrum of the cyclic receptor <b>7</b> .                                                                                                                                                  | 56 |
| <b>Table S7</b> Major excited state transitions of the cyclic receptor <b>7</b> with Osc. Strength and $\lambda_{\text{ex}}$ .                                                                                                    | 56 |
| <b>Fig. S47</b> Calculated absorption spectrum of the complex [ $5 \cdot \text{Cu}(\text{ClO}_4)_2$ ].                                                                                                                            | 57 |
| <b>Table S8</b> Major excited state transitions of the complex [ $5 \cdot \text{Cu}(\text{ClO}_4)_2$ ] with Osc. Strength and $\lambda_{\text{ex}}$ .                                                                             | 57 |
| <b>Fig. S48</b> Calculated absorption spectrum of the complex (a): [ $7 \cdot \text{Hg}^{2+}$ ] (left side); (b): [ $7 \cdot \text{Hg}^{2+}$ ] (right side).                                                                      | 58 |
| <b>Table S9</b> Major excited state transitions of the complex [ $7 \cdot \text{Hg}^{2+}$ ] (Involving left-sided alkyne as a binding unit) with Osc. Strength and $\lambda_{\text{ex}}$ .                                        | 58 |
| <b>Table S10</b> Major excited state transitions of the complex [ $7 \cdot \text{Hg}^{2+}$ ] (involving right-sided alkyne as a binding unit) with Osc. Strength and $\lambda_{\text{ex}}$ .                                      | 58 |
| <b>Table S11</b> DFT Optimized coordinates of all the compounds.                                                                                                                                                                  | 59 |
| <b>References</b>                                                                                                                                                                                                                 | 64 |

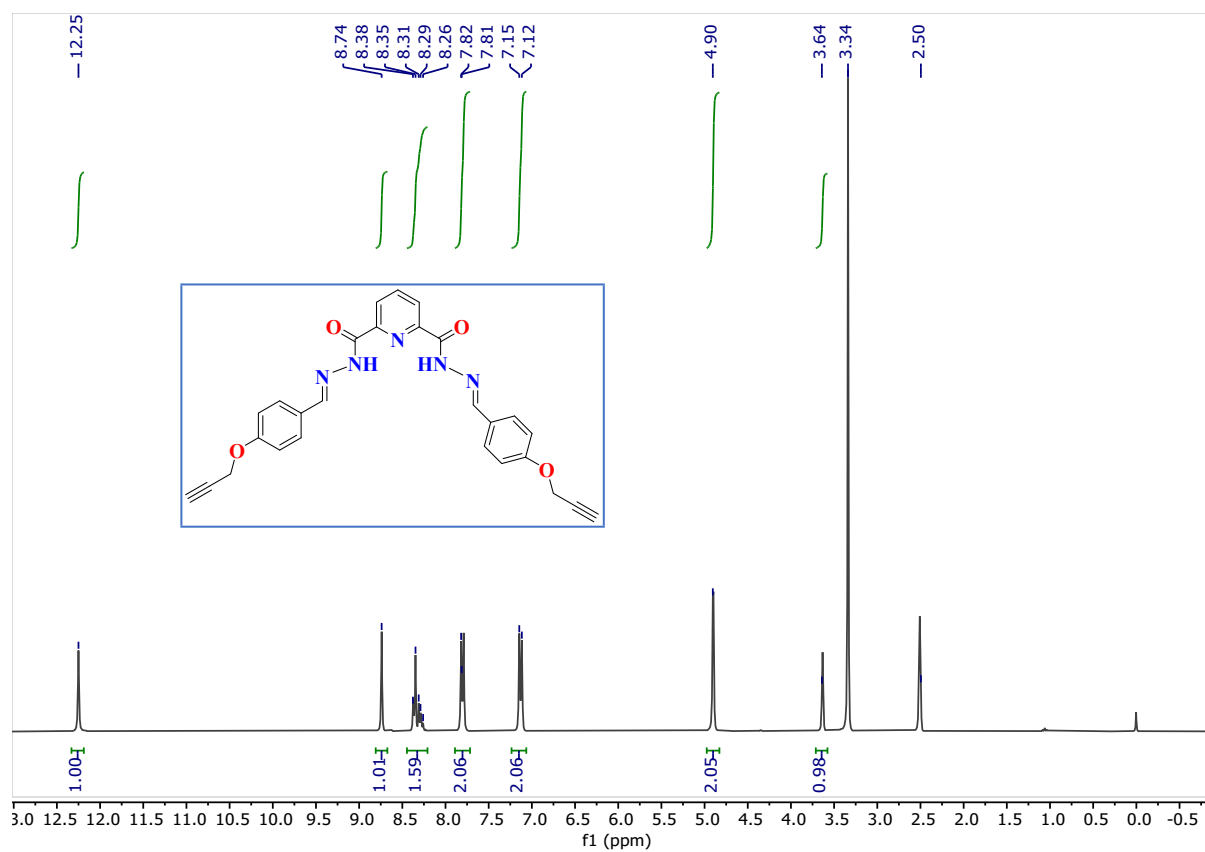

**Fig. S1** <sup>1</sup>H NMR spectra of compound **5** in DMSO-d<sub>6</sub> as a solvent.

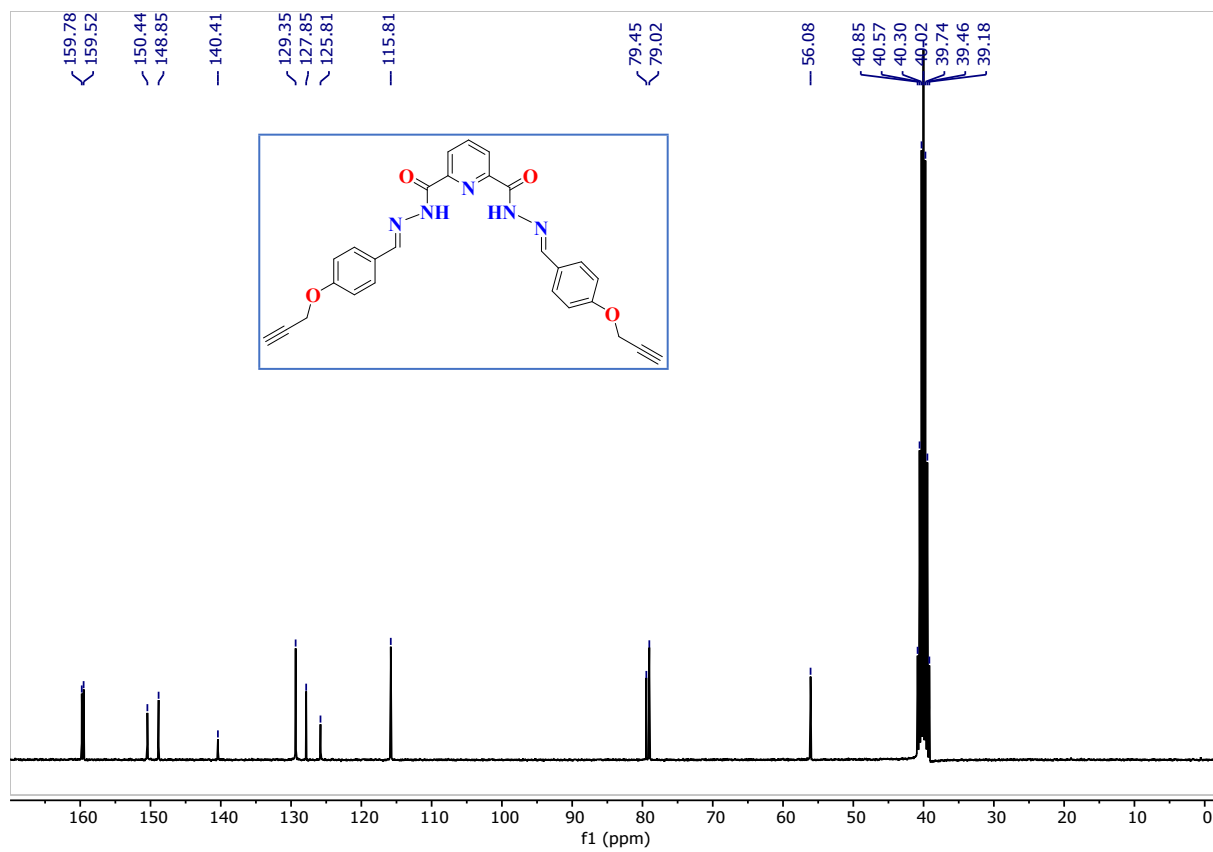

**Fig. S2**  $^{13}\text{C}$  NMR spectra of compound **5** in  $\text{DMSO-d}_6$  as a solvent.

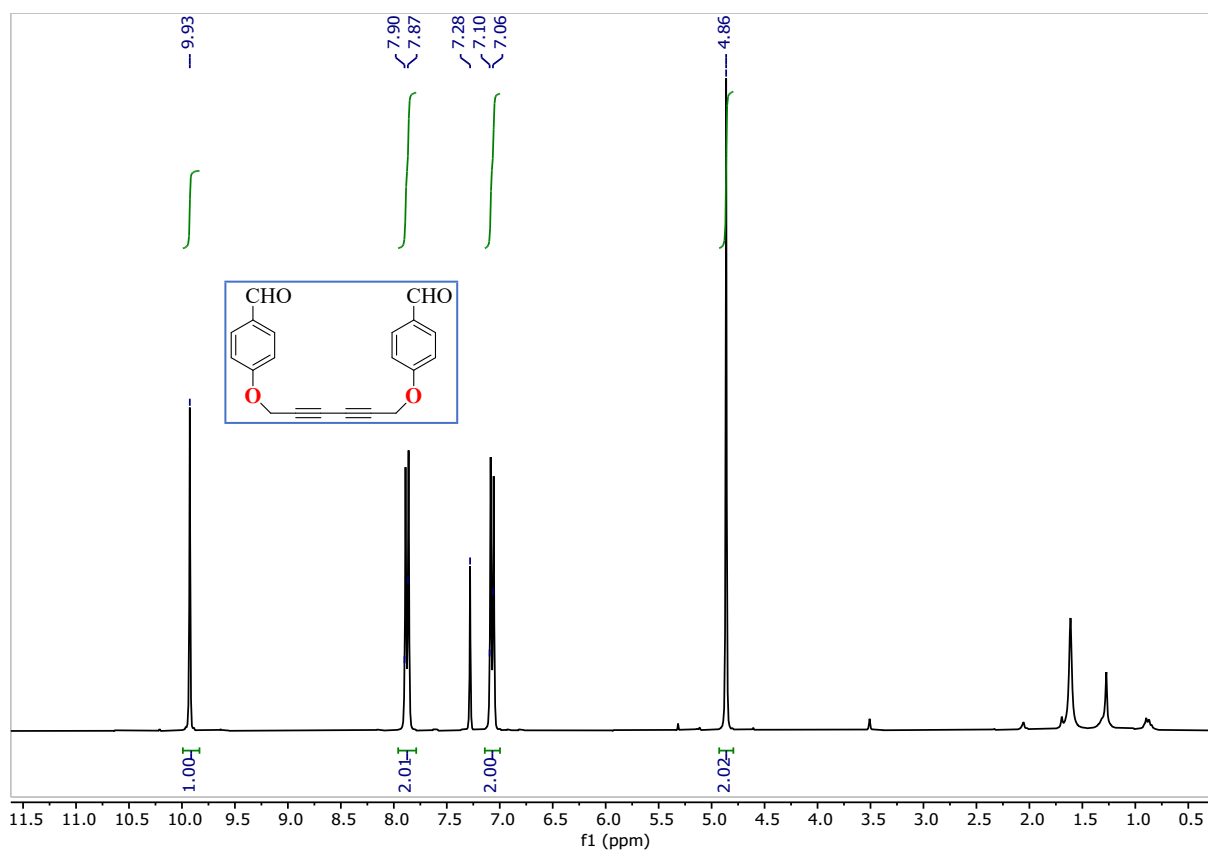

**Fig. S3**  $^1\text{H}$  NMR spectra of compound **6** in  $\text{CDCl}_3$  as a solvent.

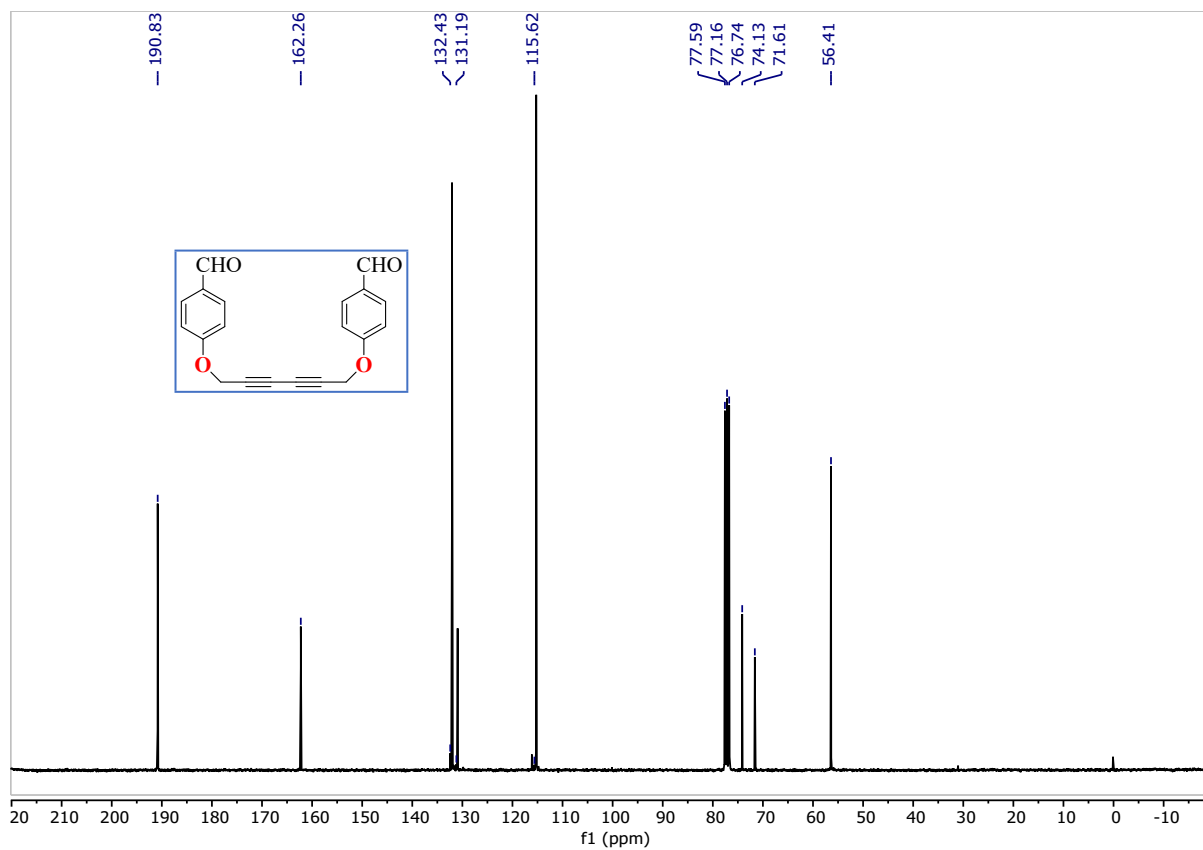

**Fig. S4**  $^{13}\text{C}$  NMR spectra of compound **6** in  $\text{CDCl}_3$  as a solvent



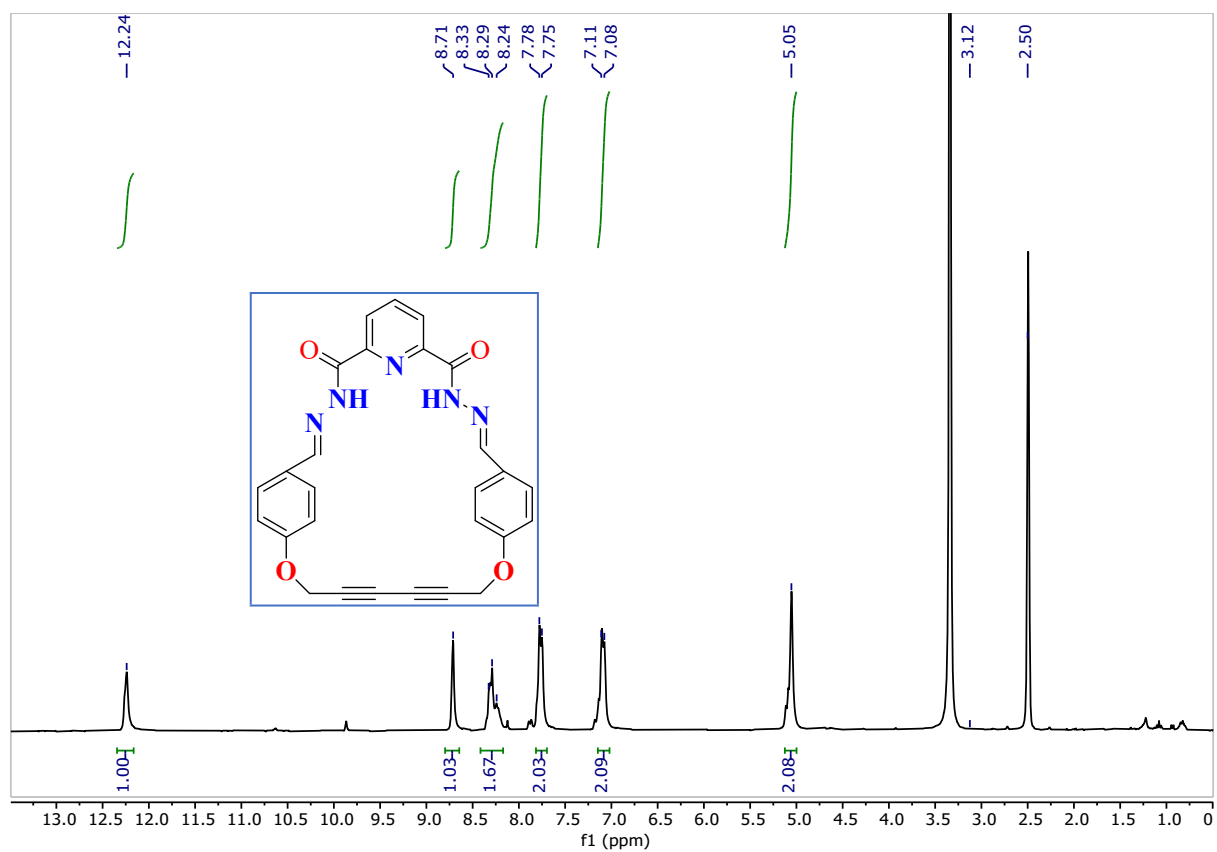

**Fig. S5.**  $^1\text{H}$  NMR spectra of compound **7** in  $\text{DMSO-d}_6$  as a solvent.

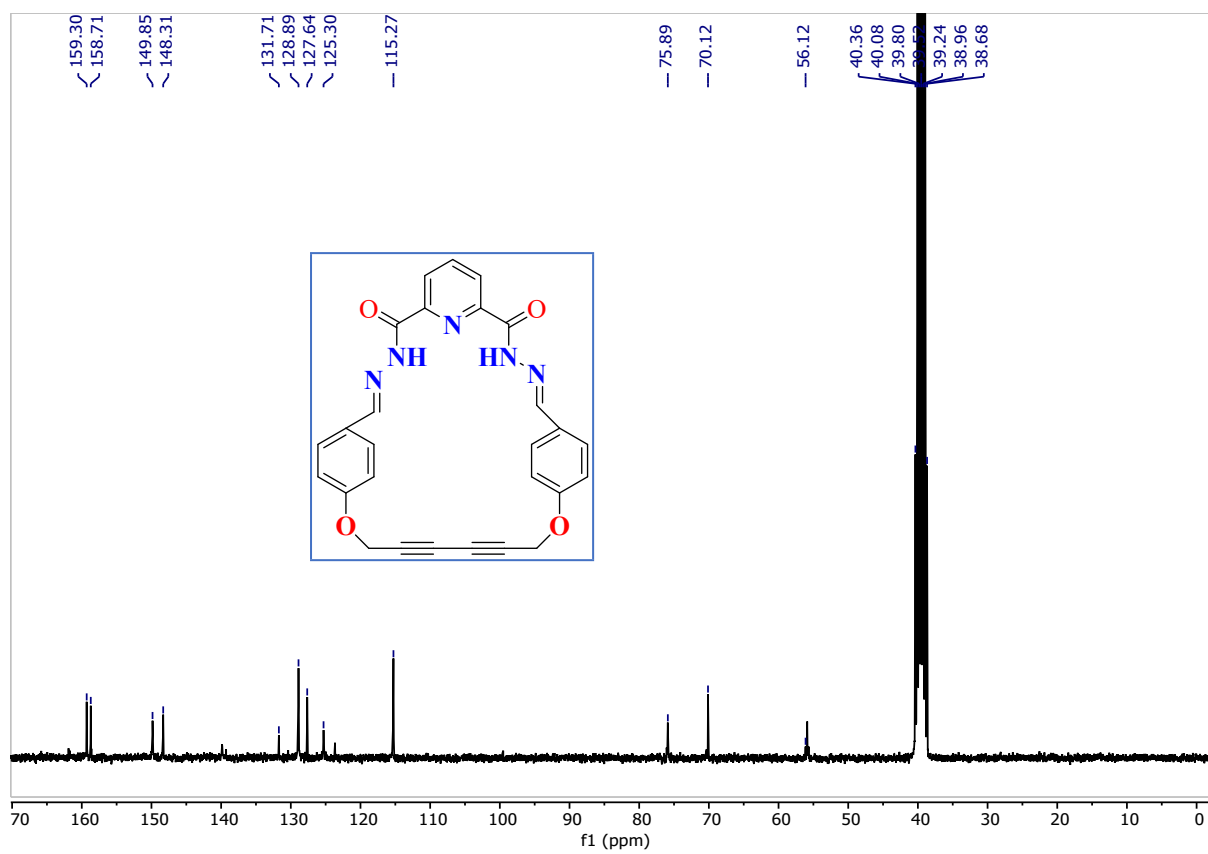

**Fig. S6.**  $^{13}\text{C}$  NMR spectra of compound **7** in  $\text{DMSO-d}_6$  as a solvent.

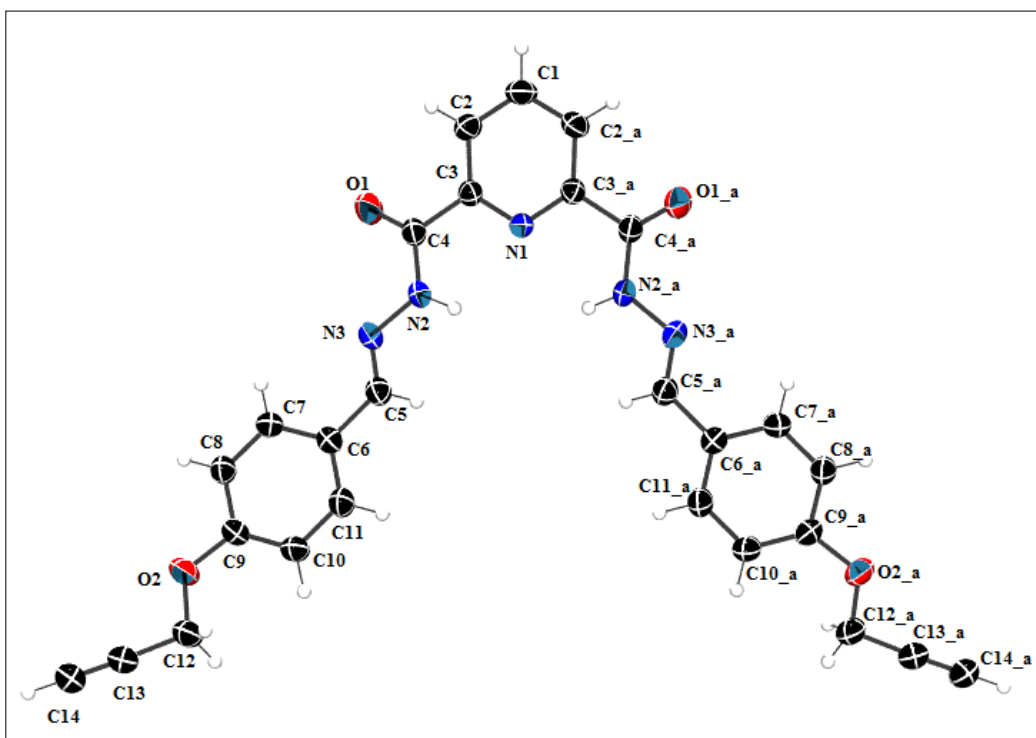

**Fig. S7** ORTEP representation of the molecular structure of **5** with thermal ellipsoids drawn at the 50% probability level. Selected bond lengths (Å) and angles (deg) for **5**: C3-N1 1.337(2), C4-O1 1.220(2), C4-N2 1.348(2), N2-N3 1.381(2), N3-C5 1.227(3), C5-C6 1.459(3), C9-O2 1.366(2), C13-C14 1.171(3); N1-C3-C4 116.74(17), N1-C3-C2 123.06(18), O1-C4-N2 124.74(18), C4-N2-N3 121.29(16), C5-N3-N2 114.71(16), N3-C5-C6 121.77(18), C9-O2-C12 118.93(16), O2-C9-C10 125.50(18).

**Table S1:** Crystal data of **5**

|                                                            |                                                               |
|------------------------------------------------------------|---------------------------------------------------------------|
| Empirical formula                                          | C <sub>27</sub> H <sub>21</sub> N <sub>5</sub> O <sub>4</sub> |
| Formula weight                                             | 479.49                                                        |
| Crystal size (mm)                                          | 0.36 X 0.28 X 0.12                                            |
| Crystal system                                             | monoclinic                                                    |
| Space group                                                | <i>C2/c</i>                                                   |
| <i>a</i> [Å]                                               | 26.676(2)                                                     |
| <i>b</i> [Å]                                               | 11.1232(8)                                                    |
| <i>c</i> [Å]                                               | 8.1112(6)                                                     |
| $\alpha$ [°]                                               | 90                                                            |
| $\beta$ [°]                                                | 103.747(4)                                                    |
| $\gamma$ [°]                                               | 90                                                            |
| volume [Å <sup>3</sup> ]                                   | 2337.9(3)                                                     |
| <i>Z</i>                                                   | 1.362                                                         |
| F(000)                                                     | 1000                                                          |
| $\mu$ MoK $\alpha$ [mm <sup>-1</sup> ]                     | 0.094                                                         |
| Temperature [K]                                            | 140(2)                                                        |
| <i>R</i> <sub>int</sub>                                    | 0.0316                                                        |
| Range of <i>h, k, l</i>                                    | -34/34, -14/14, -10/10                                        |
| $\theta_{\min/\max}$ (°)                                   | 1.992/27.113                                                  |
| Reflections collected/Unique/observed [I > 2 $\sigma$ (I)] | 27987/2588/2043                                               |
| Data/restraints/parameters                                 | 2588/0/ 164                                                   |
| GOF on <i>F</i> <sup>2</sup>                               | 1.126                                                         |
| Final <i>R</i> indices [I > 2 $\sigma$ (I)]                | <i>R</i> 1 = 0.0570<br><i>wR</i> 2 = 0.1222                   |
| <i>R</i> indices [all data]                                | <i>R</i> 1 = 0.0762<br><i>wR</i> 2 = 0.1316                   |

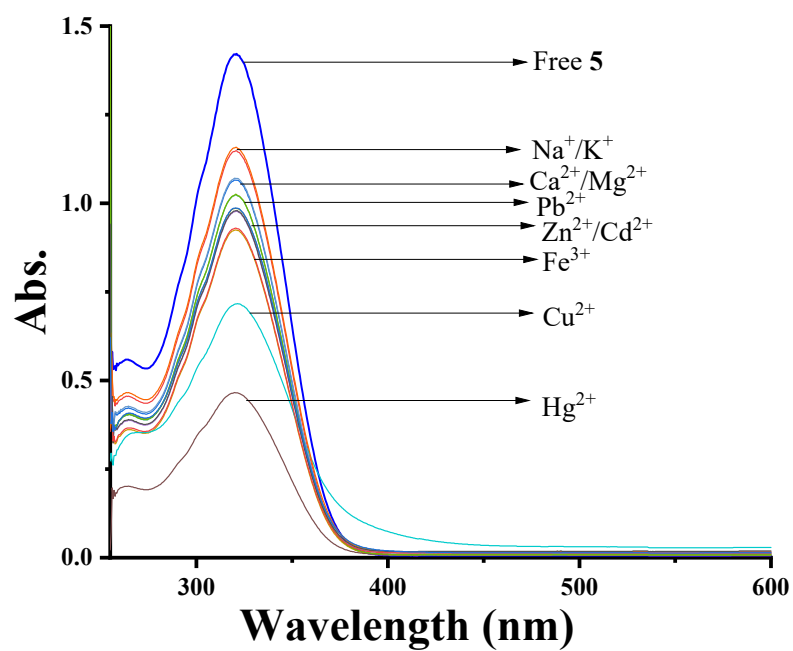

**Fig. S8** Absorption spectra of compound **5** ( $3.1 \times 10^{-5}$  M) with all metals in DMSO:H<sub>2</sub>O (7:3, v/v) at 22 °C.

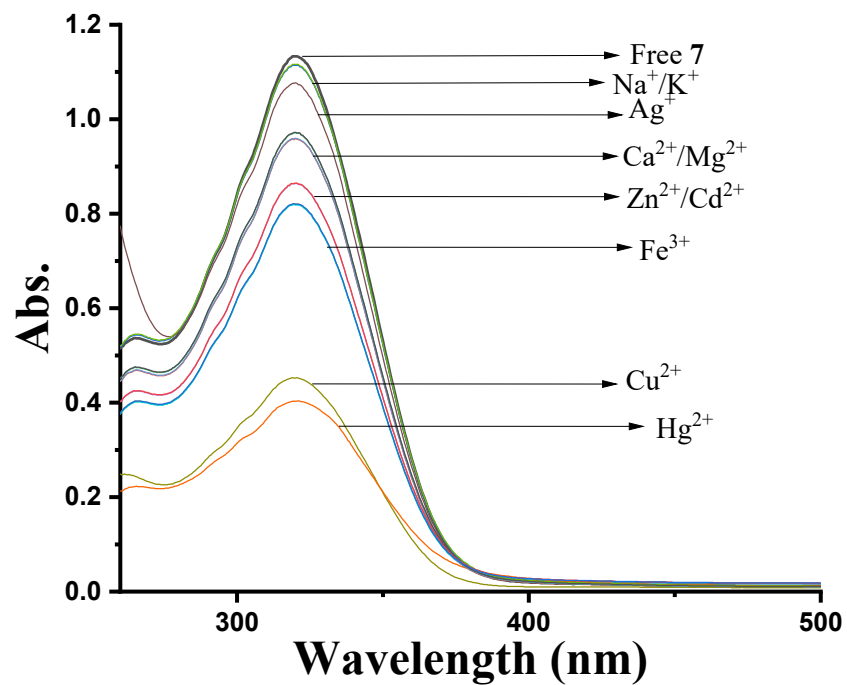

**Fig. S9** Absorption spectra of compound 7 ( $3.1 \times 10^{-5}$  M) with all metals in DMSO:H<sub>2</sub>O (7:3, v/v) at 22 °C.

Fitter: UV 1:2 Fit Summary Save

## Details

Time to fit 0.7692 s  
SSR 1.1464e-2  
Fitted datapoints 20  
Fitted params 3

## Parameters

| Parameter (bounds)              | Optimised                   | Error         | Initial                    |
|---------------------------------|-----------------------------|---------------|----------------------------|
| $K_{11} (0 \rightarrow \infty)$ | 14182.40<br>M <sup>-1</sup> | ± 1.1363<br>% | 1000.00<br>M <sup>-1</sup> |

Back

Next

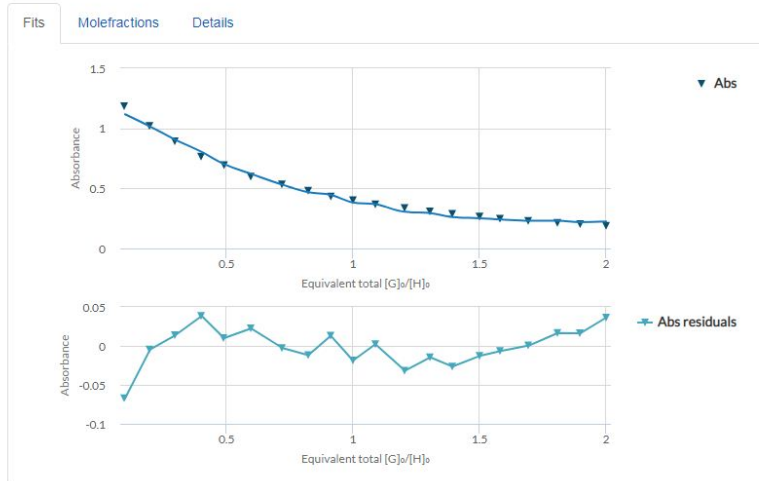

**Fig. S10** Fitting of absorption titration data of compound **5** with  $Hg^{2+}$  ion into 1:2 Nelder-Mead model in Bindfit software. Screenshots taken from the website [supramolecular.org](http://supramolecular.org). This fitting for 1:2 fitter with a minimum error of  $\pm 1.1363\%$  justifies the 1:2 binding of **5** with  $Hg^{2+}$  ion with an association constant of  $14182.40\text{ M}^{-1}$ . 20 data points have been used as input in this fitting with 3 factors viz., host concentration, guest concentration and the change in fluorescence intensity. The optimised value is the actual binding constant obtained.

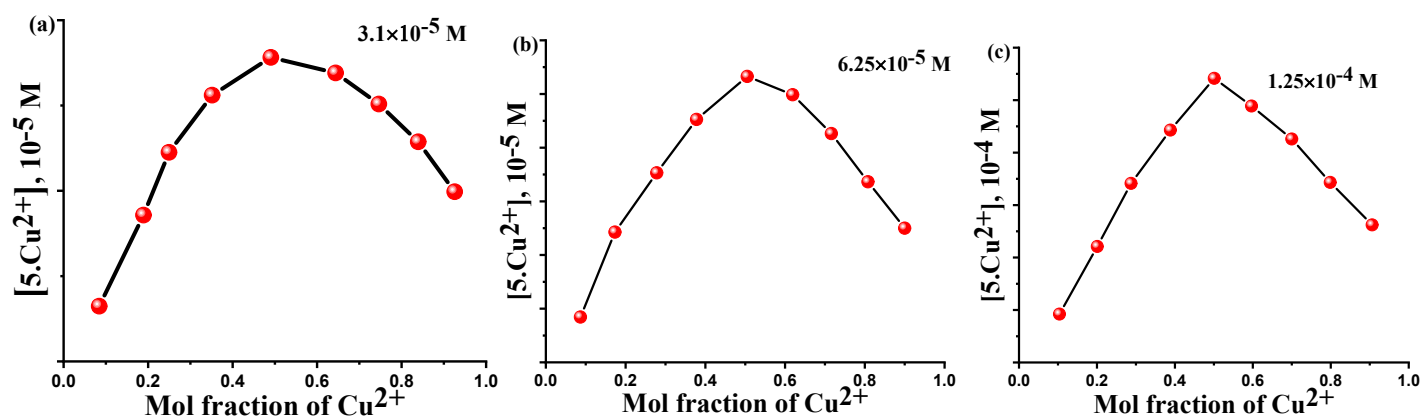

Fig. S11 Jobs plot of compound 5 with  $\text{Cu}^{2+}$  metal ion at various concentration.



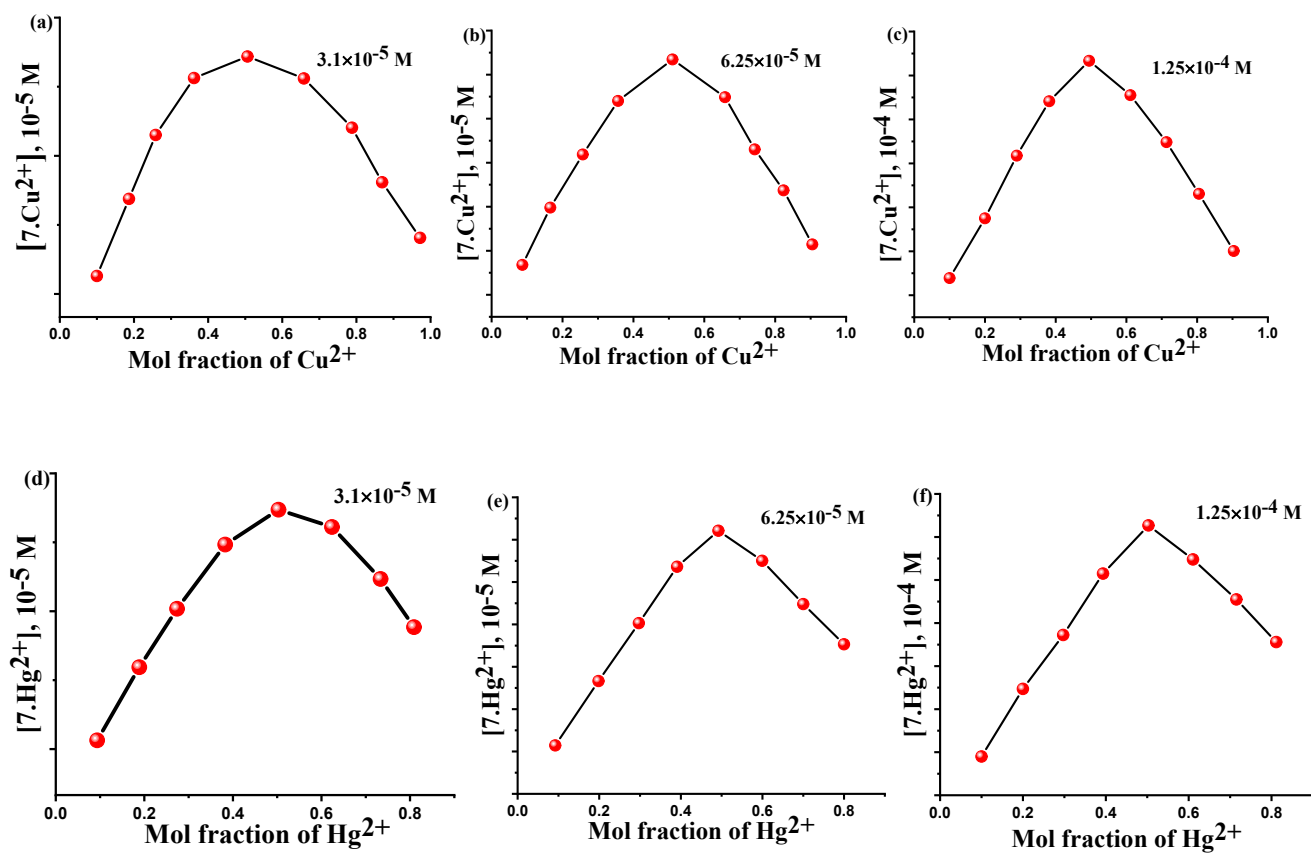

**Fig. S12** Jobs plot of compound 7 with (a)-(c)  $\text{Cu}^{2+}$  and (d)-(f)  $\text{Hg}^{2+}$  metal ions at various concentration.

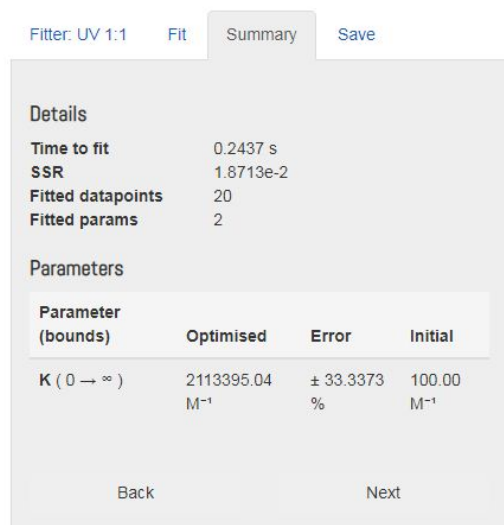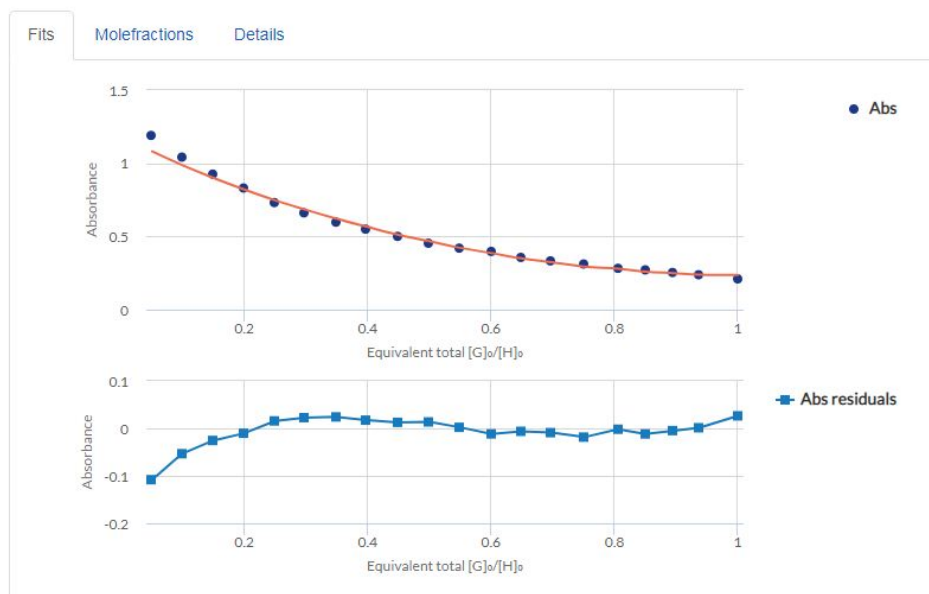

**Fig. S13** Association constant of compound **5** with  $\text{Cu}^{2+}$  ion obtained from fitting the UV-vis absorbance titration data into 1:1 Nelder-Mead model in Bindfit software. Screenshots taken from the website [supramolecular.org](http://supramolecular.org). This fitting for 1:1 fitter with an error of  $\pm 33.3373\%$  (< 40 %) justifies the 1:1 binding of **5** with  $\text{Cu}^{2+}$  ion with an association constant of  $2113395.04 \text{ M}^{-1}$ . 20 data points have been used as input in this fitting with 3 factors viz., host concentration, guest concentration and the change in fluorescence intensity. The optimised value is the actual binding constant obtained.

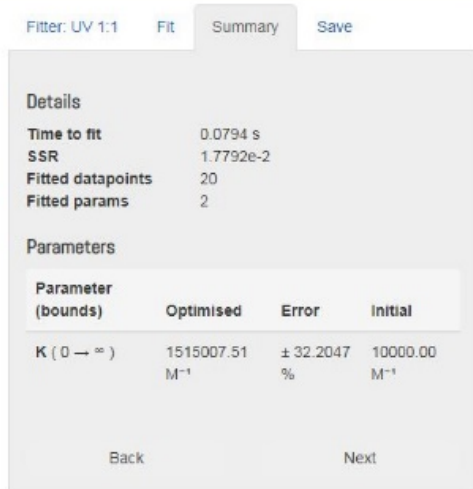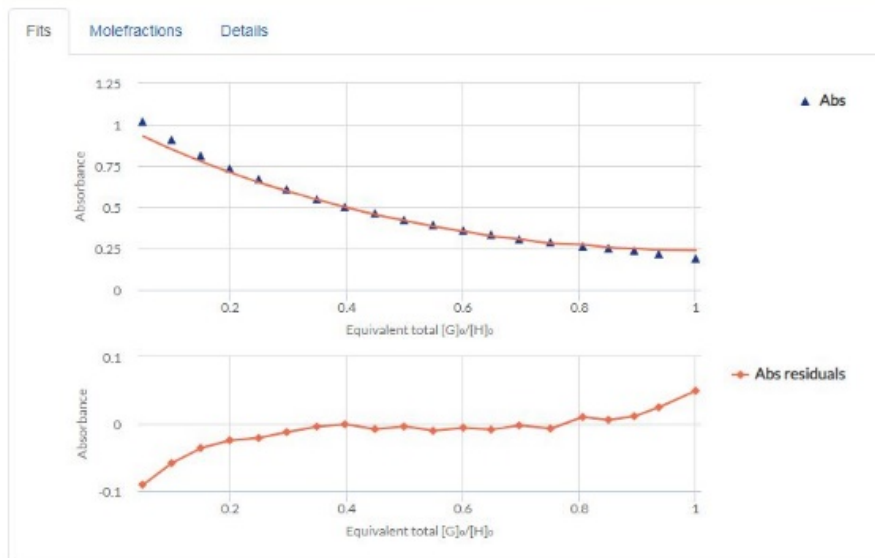

**Fig. S14** Association constant of compound **7** with Cu<sup>2+</sup> ion obtained from fitting the UV-vis absorbance titration data into 1:1 L-BFGS-B model in Bindfit software. Screenshots taken from the website [supramolecular.org](http://supramolecular.org). This fitting for 1:1 fitter with an error of ±32.2047 % (< 40 %) justifies the 1:1 binding of **7** with Cu<sup>2+</sup> ion with an association constant of 1515007.51 M<sup>-1</sup>. 20 data points have been used as input in this fitting with 3 factors viz., host concentration, guest concentration and the change in fluorescence intensity. The optimised value is the actual binding constant obtained.

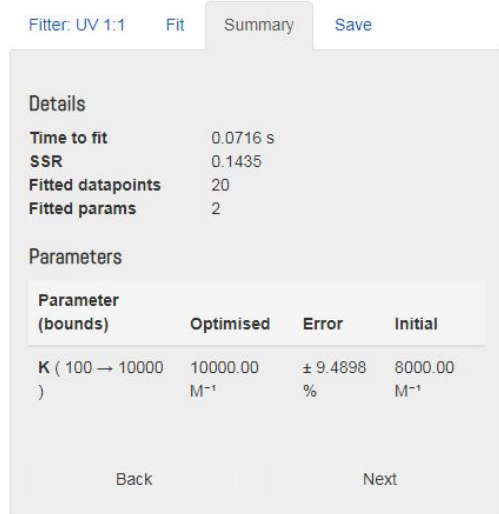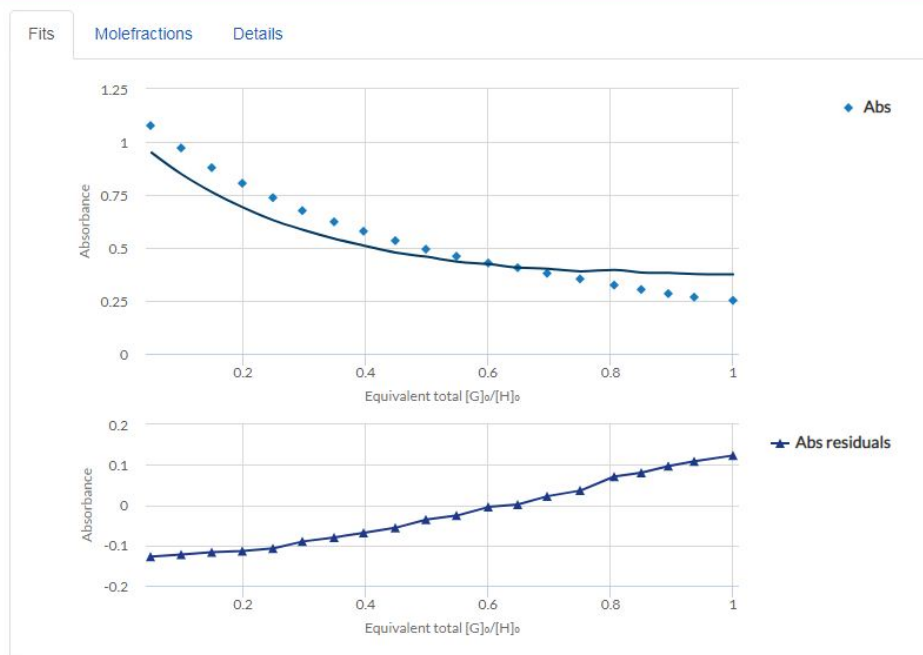

**Fig. S15** Association constant of compound **7** with  $\text{Hg}^{2+}$  ion obtained from fitting the UV-vis absorbance titration data into 1:1 L-BFGS-B model in Bindfit software. Screenshots taken from the website [supramolecular.org](http://supramolecular.org). This fitting for 1:1 fitter with an error of  $\pm 9.4898\%$  ( $< 40\%$ ) justifies the 1:1 binding of **7** with  $\text{Hg}^{2+}$  ion with an association constant of  $10000 \text{ M}^{-1}$ . 20 data points have been used as input in this fitting with 3 factors viz., host concentration, guest concentration and the change in fluorescence intensity. The optimised value is the actual binding constant obtained.

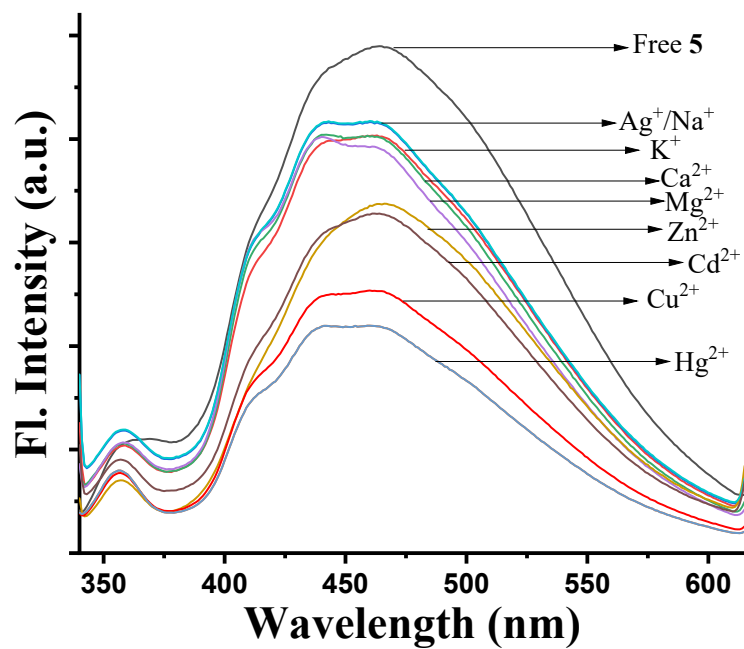

**Fig. S16** Fluorescence emission spectra of compound **5** ( $7.8 \times 10^{-6}$  M) with all metals in DMSO:H<sub>2</sub>O (7:3, v/v) solvent at 22 °C.

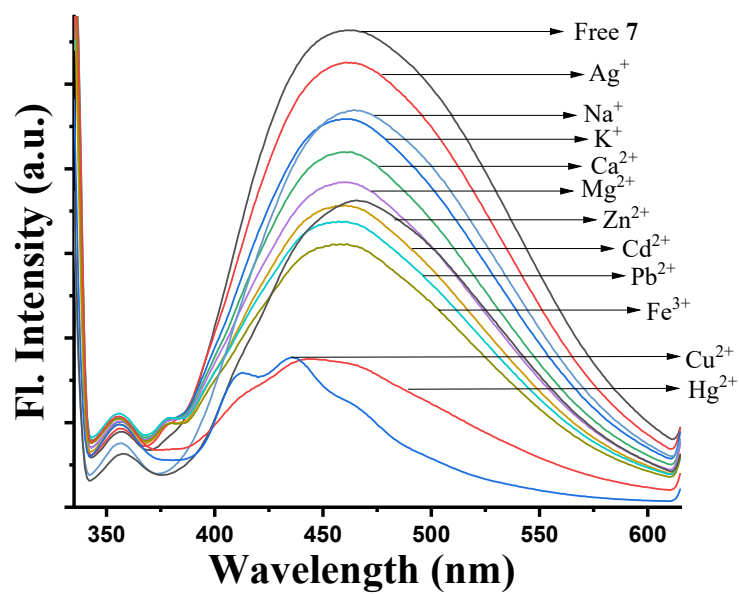

**Fig. S17** Fluorescence emission spectra of compound 7 ( $7.8 \times 10^{-6}$  M) with all metals in DMSO:H<sub>2</sub>O (7:3, v/v) solvent at 22 °C.

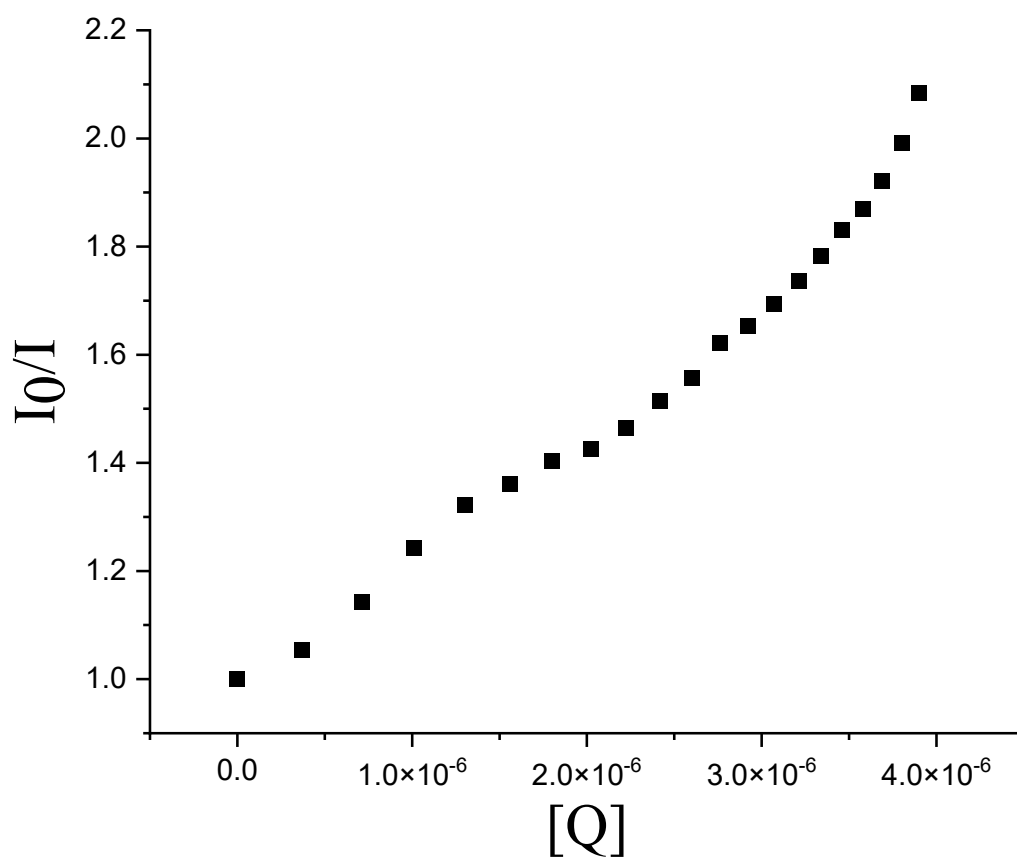

**Fig. S18** Stern-Volmer plot of  $5^+Cu^{2+}$ .

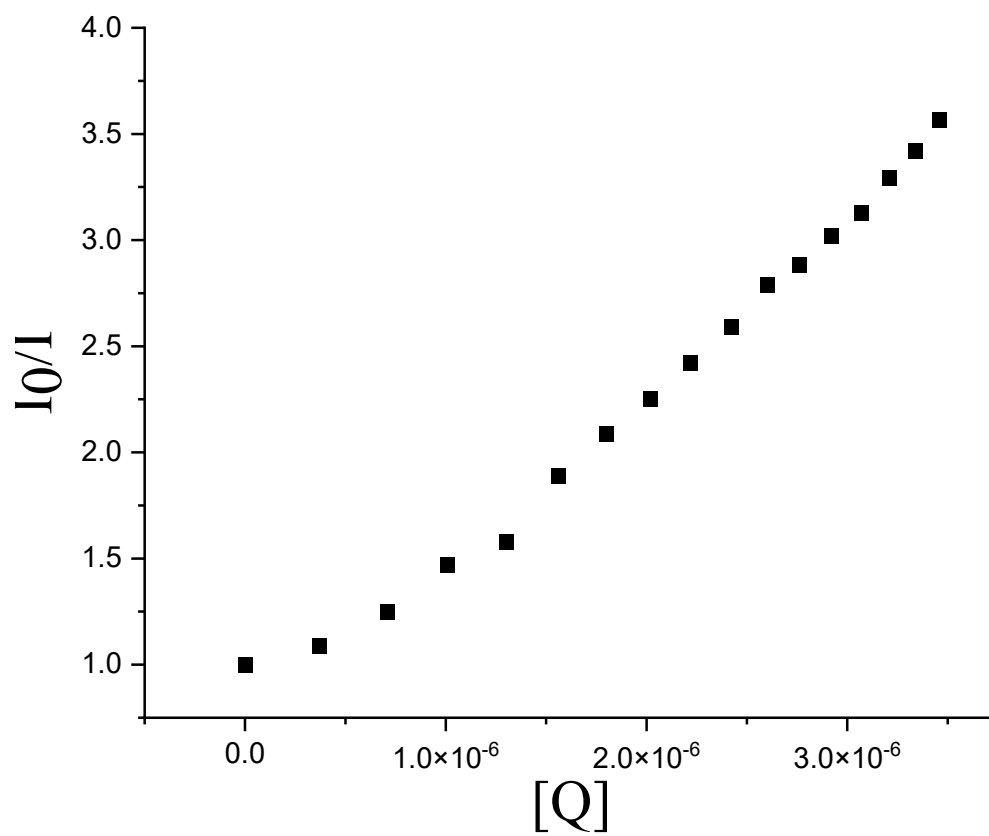

**Fig. S19** Stern-Volmer plot of 7+Cu<sup>2+</sup>.



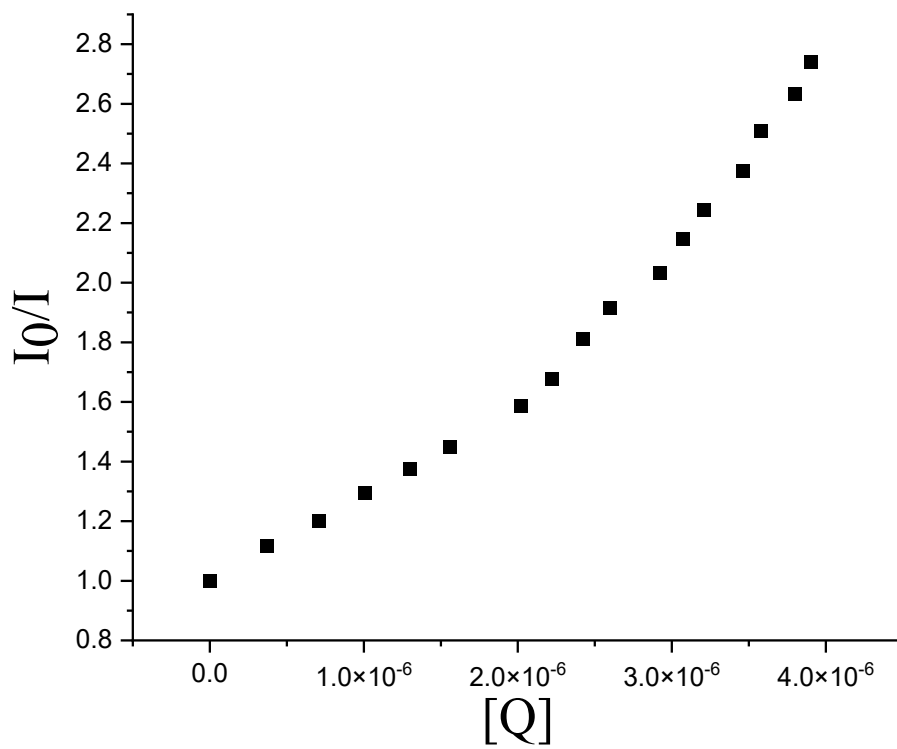

**Fig. S20** Stern-Volmer plot of  $7+Hg^{2+}$ .

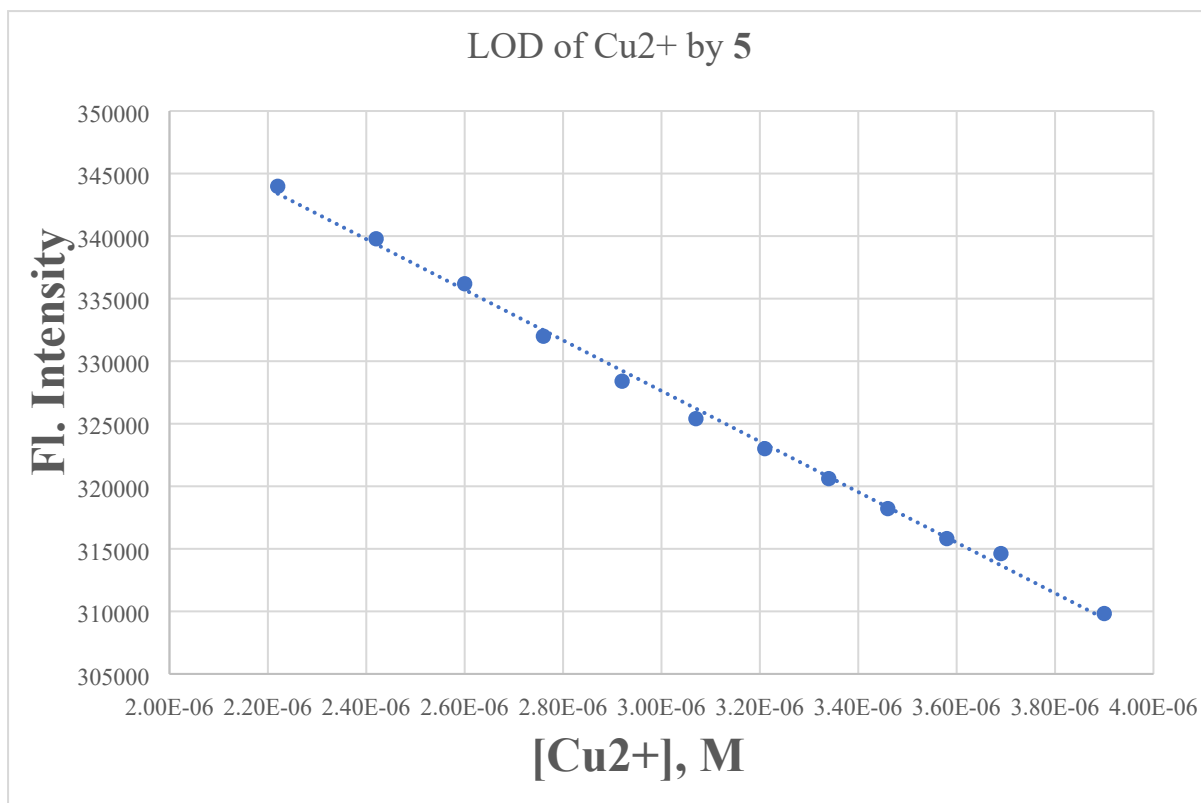

**Fig. S21** Limit of detection (LOD) of compound **5** in presence of Cu<sup>2+</sup> ion from fluorescence spectra by 3 $\sigma$ /s method.

|                              |                     |                       |               |                |                       |                  |                    |                    |  |
|------------------------------|---------------------|-----------------------|---------------|----------------|-----------------------|------------------|--------------------|--------------------|--|
| Conc of Cu                   | Fl. Intensity       |                       |               |                |                       |                  |                    |                    |  |
| 2.22E-06                     | 343980              |                       |               |                |                       |                  |                    |                    |  |
| 2.42E-06                     | 339786              |                       |               |                |                       |                  |                    |                    |  |
| 2.60E-06                     | 336191              |                       |               |                |                       |                  |                    |                    |  |
| 2.76E-06                     | 331997              |                       |               |                |                       |                  |                    |                    |  |
| 2.92E-06                     | 328401              |                       |               |                |                       |                  |                    |                    |  |
| 3.07E-06                     | 325405              |                       |               |                |                       |                  |                    |                    |  |
| 3.21E-06                     | 323009              |                       |               |                |                       |                  |                    |                    |  |
| 3.34E-06                     | 320612              |                       |               |                |                       |                  |                    |                    |  |
| 3.46E-06                     | 318215              |                       |               |                |                       |                  |                    |                    |  |
| 3.58E-06                     | 315818              |                       |               |                |                       |                  |                    |                    |  |
| 3.69E-06                     | 314620              |                       |               |                |                       |                  |                    |                    |  |
| 3.90E-06                     | 309827              |                       |               |                |                       |                  |                    |                    |  |
| SUMMARY OUTPUT               |                     |                       |               |                |                       |                  |                    |                    |  |
| <b>Regression Statistics</b> |                     |                       |               |                |                       |                  |                    |                    |  |
| Multiple R                   | 0.998571            |                       |               |                |                       |                  |                    |                    |  |
| R Square                     | 0.997144            |                       |               |                |                       |                  |                    |                    |  |
| Adjusted R Square            | 0.996858            |                       |               |                |                       |                  |                    |                    |  |
| Standard Error               | 597.8115            |                       |               |                |                       |                  |                    |                    |  |
| Observations                 | 12                  |                       |               |                |                       |                  |                    |                    |  |
| <b>ANOVA</b>                 |                     |                       |               |                |                       |                  |                    |                    |  |
|                              | <i>df</i>           | <i>SS</i>             | <i>MS</i>     | <i>F</i>       | <i>Significance F</i> |                  |                    |                    |  |
| Regression                   | 1                   | 1.25E+09              | 1.25E+09      | 3490.972       | 4.68E-14              |                  |                    |                    |  |
| Residual                     | 10                  | 3573786               | 357378.6      |                |                       |                  |                    |                    |  |
| Total                        | 11                  | 1.25E+09              |               |                |                       |                  |                    |                    |  |
| <b>Coefficients</b>          |                     |                       |               |                |                       |                  |                    |                    |  |
|                              | <i>Coefficients</i> | <i>Standard Error</i> | <i>t Stat</i> | <i>P-value</i> | <i>Lower 95%</i>      | <i>Upper 95%</i> | <i>Lower 95.0%</i> | <i>Upper 95.0%</i> |  |
| Intercept                    | 388266.7            | 1073.658              | 361.63        | 6.43E-22       | 385874.5              | 390659           | 385874.5           | 390659             |  |
| X Variable                   | -2E+10              | 3.42E+08              | -59.0844      | 4.68E-14       | -2.1E+10              | -1.9E+10         | -2.1E+10           | -1.9E+10           |  |

Fig. S22 Excel sheet for 5+Cu<sup>2+</sup> LOD calculation

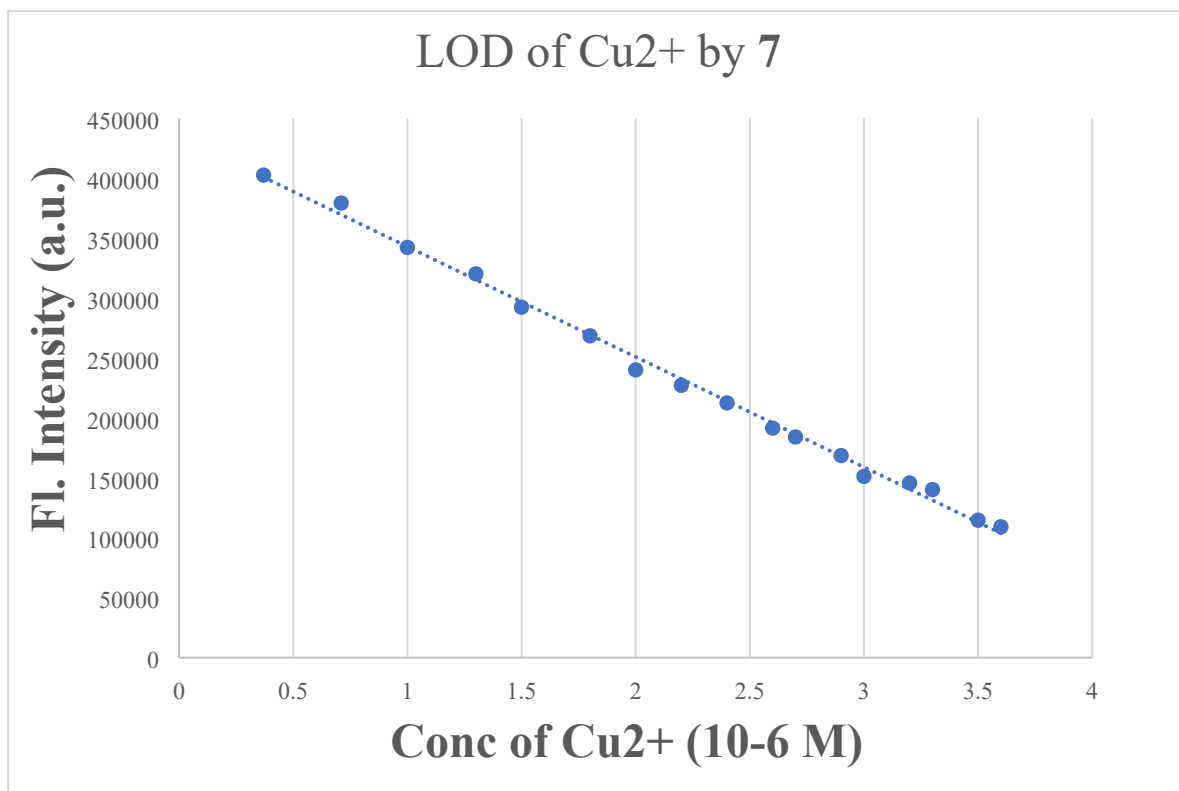

**Fig. S23** Limit of detection (LOD) of compound **7** in presence of Cu<sup>2+</sup> ion from fluorescence spectra by 3 $\sigma$ /s method.

| Conc of Cu <sup>2+</sup> | Fl.intensity |
|--------------------------|--------------|
| 0.37                     | 402654       |
| 0.71                     | 379315       |
| 1                        | 342297       |
| 1.3                      | 320226       |
| 1.5                      | 292405       |
| 1.8                      | 268494       |
| 2                        | 240101       |
| 2.2                      | 227226       |
| 2.4                      | 212512       |
| 2.6                      | 191477       |
| 2.7                      | 184119       |
| 2.9                      | 168602       |
| 3                        | 151245       |
| 3.2                      | 145727       |
| 3.3                      | 140209       |
| 3.5                      | 114691       |
| 3.6                      | 109173       |

| SUMMARY OUTPUT               |                     |                       |               |                |                       |                  |                    |                    |
|------------------------------|---------------------|-----------------------|---------------|----------------|-----------------------|------------------|--------------------|--------------------|
| <i>Regression Statistics</i> |                     |                       |               |                |                       |                  |                    |                    |
| Multiple R                   | 0.9981031           |                       |               |                |                       |                  |                    |                    |
| R Square                     | 0.9962097           |                       |               |                |                       |                  |                    |                    |
| Adjusted R Square            | 0.9959571           |                       |               |                |                       |                  |                    |                    |
| Standard Error               | 5845.8903           |                       |               |                |                       |                  |                    |                    |
| Observations                 | 17                  |                       |               |                |                       |                  |                    |                    |
| <i>ANOVA</i>                 |                     |                       |               |                |                       |                  |                    |                    |
|                              | <i>df</i>           | <i>SS</i>             | <i>MS</i>     | <i>F</i>       | <i>Significance F</i> |                  |                    |                    |
| Regression                   | 1                   | 1.35E+11              | 1.35E+11      | 3942.516       | 1.4E-19               |                  |                    |                    |
| Residual                     | 15                  | 5.13E+08              | 34174434      |                |                       |                  |                    |                    |
| Total                        | 16                  | 1.35E+11              |               |                |                       |                  |                    |                    |
|                              | <i>Coefficients</i> | <i>Standard Error</i> | <i>t Stat</i> | <i>P-value</i> | <i>Lower 95%</i>      | <i>Upper 95%</i> | <i>Lower 95.0%</i> | <i>Upper 95.0%</i> |
| Intercept                    | 434909.28           | 3574.913              | 121.6559      | 7.03E-24       | 427289.5              | 442529           | 427289.5           | 442529             |
| X Variable 1                 | -91990.145          | 1465.057              | -62.7895      | 1.4E-19        | -95112.8              | -88867.4         | -95112.8           | -88867.4           |

**Fig. S24** Excel sheet for 7+Cu<sup>2+</sup> LOD calculation.

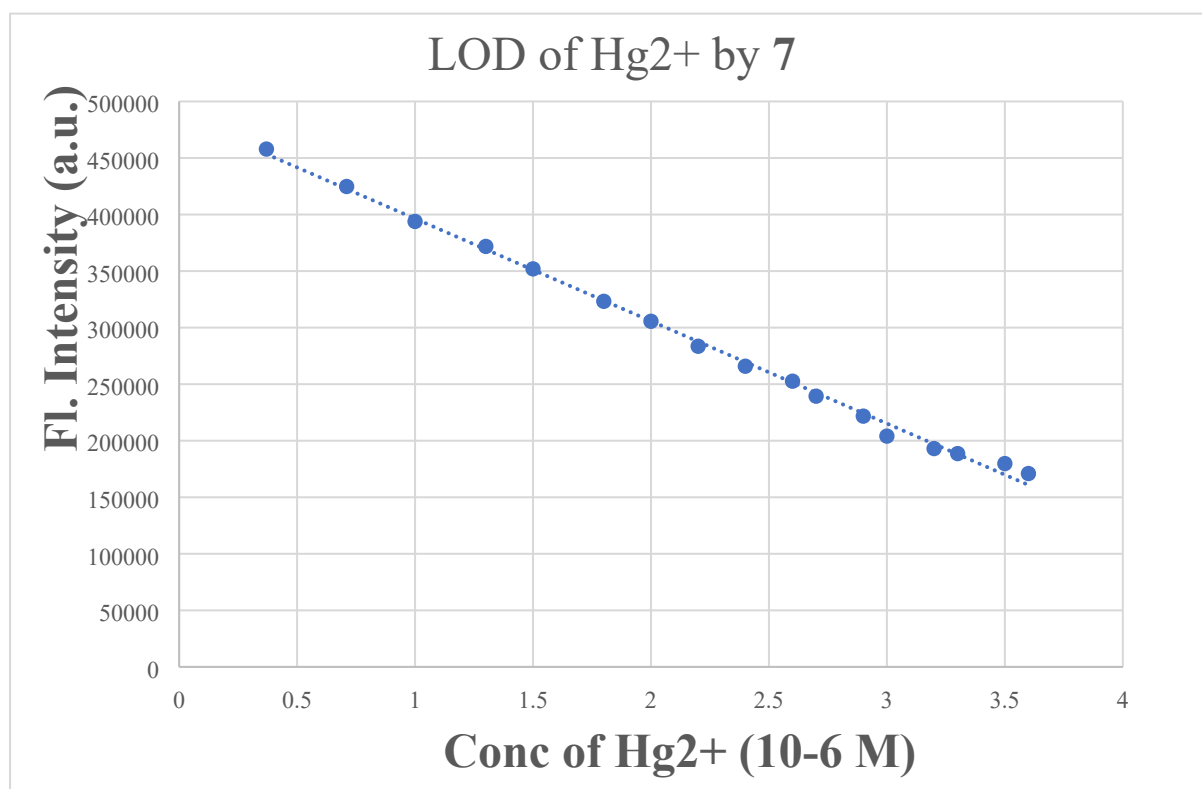

**Fig. S25** Limit of detection (LOD) of compound **7** in presence of Hg<sup>2+</sup> ion from fluorescence spectra by  $3\sigma/s$  method.

| Conc of Hg <sup>2+</sup> | Fl.intensity |
|--------------------------|--------------|
| 0.37                     | 457894       |
| 0.71                     | 424787       |
| 1                        | 393887       |
| 1.3                      | 371816       |
| 1.5                      | 351952       |
| 1.8                      | 323259       |
| 2                        | 305602       |
| 2.2                      | 283531       |
| 2.4                      | 265874       |
| 2.6                      | 252631       |
| 2.7                      | 239388       |
| 2.9                      | 221731       |
| 3                        | 204074       |
| 3.2                      | 193039       |
| 3.3                      | 188624       |
| 3.5                      | 179796       |
| 3.6                      | 170967       |

| SUMMARY OUTPUT               |                     |                       |               |                |                       |                  |                    |                    |
|------------------------------|---------------------|-----------------------|---------------|----------------|-----------------------|------------------|--------------------|--------------------|
| <i>Regression Statistics</i> |                     |                       |               |                |                       |                  |                    |                    |
| Multiple R                   | 0.9983704           |                       |               |                |                       |                  |                    |                    |
| R Square                     | 0.9967435           |                       |               |                |                       |                  |                    |                    |
| Adjusted R Square            | 0.9965264           |                       |               |                |                       |                  |                    |                    |
| Standard Error               | 5333.8425           |                       |               |                |                       |                  |                    |                    |
| Observations                 | 17                  |                       |               |                |                       |                  |                    |                    |
| <i>ANOVA</i>                 |                     |                       |               |                |                       |                  |                    |                    |
|                              | <i>df</i>           | <i>SS</i>             | <i>MS</i>     | <i>F</i>       | <i>Significance F</i> |                  |                    |                    |
| Regression                   | 1                   | 1.31E+11              | 1.31E+11      | 4591.216       | 4.5E-20               |                  |                    |                    |
| Residual                     | 15                  | 4.27E+08              | 28449876      |                |                       |                  |                    |                    |
| Total                        | 16                  | 1.31E+11              |               |                |                       |                  |                    |                    |
|                              | <i>Coefficients</i> | <i>Standard Error</i> | <i>t Stat</i> | <i>P-value</i> | <i>Lower 95%</i>      | <i>Upper 95%</i> | <i>Lower 95.0%</i> | <i>Upper 95.0%</i> |
| Intercept                    | 486937.95           | 3261.782              | 149.2859      | 3.27E-25       | 479985.6              | 493890.3         | 479985.6           | 493890.3           |
| X Variable 1                 | -90574.92           | 1336.731              | -67.7585      | 4.5E-20        | -93424.1              | -87725.7         | -93424.1           | -87725.7           |

**Fig. S26** Excel sheet for 7+Hg<sup>2+</sup> LOD calculation.

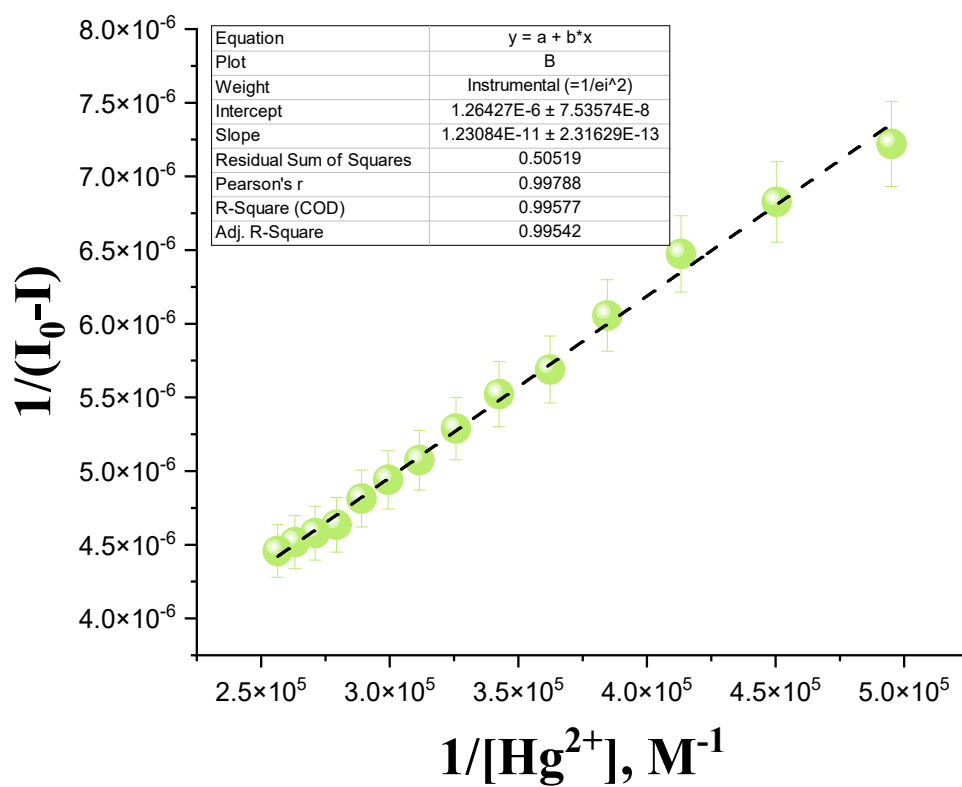

**Fig. S27** Association constant of compound **5** with  $\text{Cu}^{2+}$  ion from Benesi-Hildebrand plot. Error bars represent standard deviation.



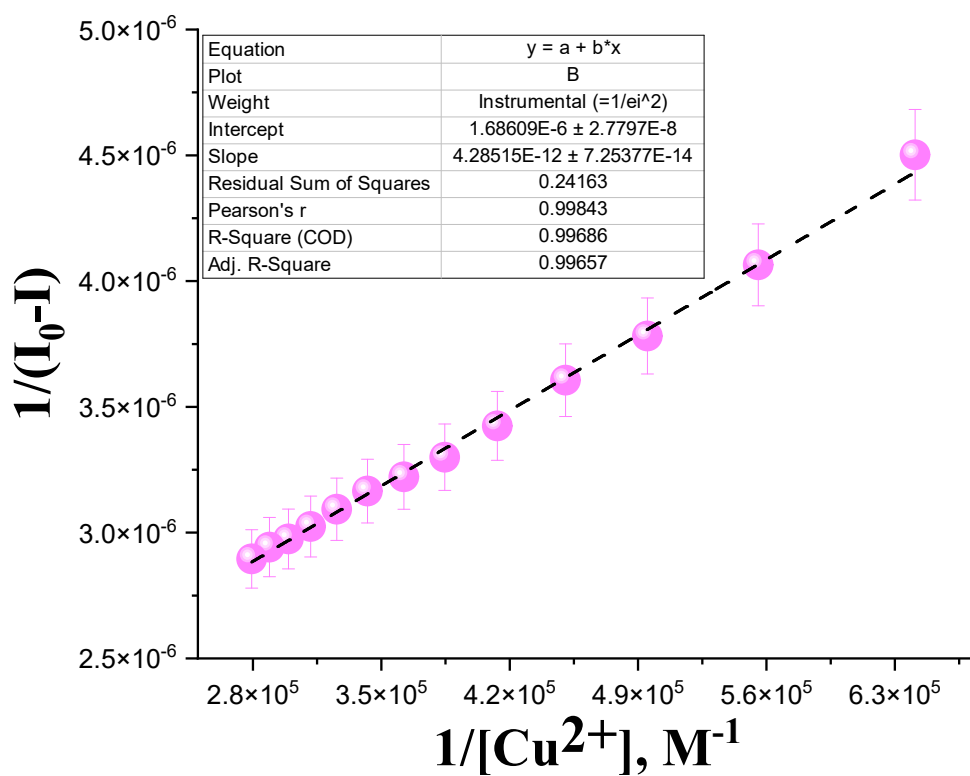

**Fig. S28** Association constant of compound **7** with  $\text{Cu}^{2+}$  ion from Benesi-Hildebrand plot. Error bars represent standard deviation.

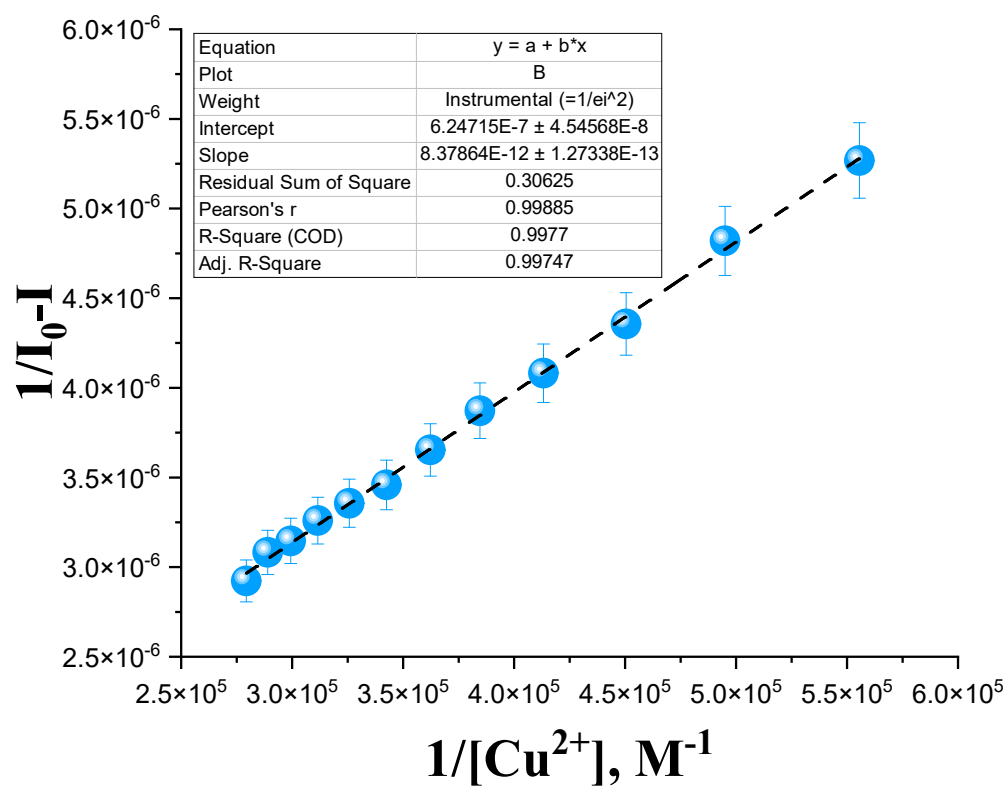

**Fig. S29** Association constant of compound **7** with  $\text{Hg}^{2+}$  ion from Benesi-Hildebrand plot. Error bars represent standard deviation.

**Table S2.** Comparison table for LOD and association constant.

| Entry | Ligand molecular formula    | Solvent                                | LOD                                                                                    | Association Constant                                                                           | Method of detection                                                | Ref |
|-------|-----------------------------|----------------------------------------|----------------------------------------------------------------------------------------|------------------------------------------------------------------------------------------------|--------------------------------------------------------------------|-----|
| 1     | $C_{31}H_{37}N_5O_3$        | HEPES buffer<br>(pH 7.5)               | (a) $3.5 \times 10^{-6}$ M for $Cu^{2+}$<br>(b) $6.11 \times 10^{-8}$ M for $Hg^{2+}$  | (a) $3.51 \times 10^6$ $M^{-1}$ for $Cu^{2+}$<br>(b) $6.06 \times 10^6$ $M^{-1}$ for $Hg^{2+}$ | (a) Turn-Off fluorescence<br>(b) Turn-On fluorescence              | 1   |
| 2     | $C_{15}H_{12}N_6O$          | $CH_3OH/H_2O$<br>(1:1)                 | (a) $50 \times 10^{-9}$ M for $Cu^{2+}$<br>(b) $0.8 \times 10^{-8}$ M for $Hg^{2+}$    | (a) $1.3 \times 10^5$ $M^{-1}$ for $Cu^{2+}$<br>(b) $0.05 \times 10^5$ $M^{-1}$ for $Hg^{2+}$  | (a) Turn-On fluorescence<br>(b) Turn-On fluorescence               | 2   |
| 3     | $C_{47}H_{48}N_4OS_2$       | THF/HEPES buffer<br>(8:2, v/v, pH 7.4) | (a) $97 \times 10^{-9}$ M for $Cu^{2+}$<br>(b) $80 \times 10^{-8}$ M for $Hg^{2+}$     | (a) $3.5 \times 10^6$ $M^{-1}$ for $Cu^{2+}$                                                   | (a) Turn-Off fluorescence<br>(b) Turn-Off fluorescence             | 3   |
| 4     | $C_{47}H_{48}N_4O$          | THF/HEPES buffer (v/v, 7:3, pH 7.4)    | (a) $2.1 \times 10^{-8}$ M for $Cu^{2+}$<br>(b) $1.8 \times 10^{-8}$ M for $Hg^{2+}$   | (a) $1.6 \times 10^7$ $M^{-1}$ for $Cu^{2+}$                                                   | (a) Ratiometric in fluorescence<br>(b) Ratiometric in fluorescence | 4   |
| 5     | $C_{260}H_{491}N_5O_{117}S$ | $H_2O$                                 | (a) $5.92 \times 10^{-7}$ M for $Cu^{2+}$<br>(b) $2.85 \times 10^{-6}$ M for $Hg^{2+}$ | (a) $5.38 \times 10^4$ $M^{-1}$ for $Cu^{2+}$<br>(b) $1.63 \times 10^5$ $M^{-1}$ for $Hg^{2+}$ | (a) Turn-On fluorescence<br>(b) Turn-On fluorescence               | 5   |
| 6     | $C_{32}H_{33}FeN_3O_2S_2$   | $CH_3CN/H_2O$<br>(7:3, v/v)            | (a) $6.17 \times 10^{-7}$ M for $Cu^{2+}$<br>(b) $7.94 \times 10^{-7}$ M for $Hg^{2+}$ | (a) $9.06 \times 10^4$ $M^{-1}$ for $Cu^{2+}$<br>(b) $3.01 \times 10^4$ $M^{-1}$ for $Hg^{2+}$ | (a) Turn-On fluorescence<br>(b) Turn-Off fluorescence              | 6   |
| 7     | $C_{24}H_{22}N_2O_5S$       | HEPES buffer                           | (a) $2.02 \times 10^{-6}$ M for $Cu^{2+}$<br>(b) $1.24 \times 10^{-6}$ M for $Hg^{2+}$ | (a) $2.4 \times 10^5$ $M^{-1}$ for $Cu^{2+}$<br>(b) $7.46 \times 10^5$ $M^{-1}$ for $Hg^{2+}$  | (a) Turn-Off fluorescence<br>(b) Turn-Off fluorescence             | 7   |

|    |                                                           |                          |                                                                                                                                                 |                                                                                                                                                  |                                                        |           |
|----|-----------------------------------------------------------|--------------------------|-------------------------------------------------------------------------------------------------------------------------------------------------|--------------------------------------------------------------------------------------------------------------------------------------------------|--------------------------------------------------------|-----------|
| 8  | $C_{23}H_{20}N_2O$                                        | $CH_3CN/H_2O$            | (a) $7.74 \times 10^{-6}$ M for $Cu^{2+}$<br>(b) $7.67 \times 10^{-6}$ M for $Hg^{2+}$                                                          | (a) $\log \beta = 5.23$ $M^{-1}$ for $Cu^{2+}$<br>(b) $\log \beta = 5.49$ $M^{-1}$ for $Hg^{2+}$                                                 | (a) Turn-Off fluorescence<br>(b) Turn-Off fluorescence | 8         |
| 9  | $C_{22}H_{20}FeS$ and<br>$C_{22}H_{20}FeO_2S$             | $CH_3CN$                 | (a) $5.22 \times 10^{-7}$ M for $Cu^{2+}$<br>(b) $6.93 \times 10^{-7}$ M for $Hg^{2+}$                                                          | (a) $5.74 \times 10^4$ $M^{-1}$ for $Cu^{2+}$<br>(b) $5 \times 10^4$ $M^{-1}$ for $Hg^{2+}$                                                      | (a) Absorption increases<br>(b) Absorption increases   | 9         |
| 10 | $C_{20}H_{13}NS_3$                                        | $THF/H_2O$ (7:3, v/v)    | (a) $7.06 \times 10^{-8}$ M for $Cu^{2+}$<br>(b) $1.16 \times 10^{-7}$ M for $Hg^{2+}$                                                          | (a) $9.4 \times 10^4$ $M^{-1}$ for $Cu^{2+}$<br>(b) $8.69 \times 10^4$ $M^{-1}$ for $Hg^{2+}$                                                    | (a) Turn-Off fluorescence<br>(b) Turn-On fluorescence  | 10        |
| 11 | $C_{56}H_{67}N_6O_2$                                      | $CH_3CN/H_2O$ (1:1, v/v) | (a) $1.3 \times 10^{-6}$ M for $Cu^{2+}$<br>(b) $1.45 \times 10^{-6}$ M for $Hg^{2+}$                                                           | (a) $3.25 \times 10^7$ $M^{-1}$ for $Cu^{2+}$<br>(b) $6.88 \times 10^6$ $M^{-2}$ for $Hg^{2+}$                                                   | (a) Turn-Off fluorescence<br>(b) Turn-Off fluorescence | 11        |
| 12 | $C_{21}H_{22}N_3O_2S$                                     | $DMSO/H_2O$ (9:1, v/v)   | (a) $2.9 \times 10^{-6}$ M for $Cu^{2+}$<br>(b) $2 \times 10^{-9}$ M for $Hg^{2+}$                                                              | (a) $5.69 \times 10^5$ $M^{-1}$ for $Cu^{2+}$<br>(b) $1.85 \times 10^4$ $M^{-2}$ for $Hg^{2+}$                                                   | (a) Turn-Off fluorescence<br>(b) Turn-Off fluorescence | 12        |
| 13 | $C_{27}H_{21}N_5O_4$ (5)<br>&<br>$C_{27}H_{19}N_5O_4$ (7) | $DMSO/H_2O$ (7:3, v/v)   | (a) $5.5 \times 10^{-7}$ M for (5- $Cu^{2+}$ ) and $5.2 \times 10^{-7}$ M for (7- $Cu^{2+}$ )<br>(b) $4.4 \times 10^{-7}$ M for (7- $Hg^{2+}$ ) | (a) $1.02 \times 10^5$ $M^{-1}$ (5- $Cu^{2+}$ ) and $3.9 \times 10^5$ $M^{-1}$ (7- $Cu^{2+}$ )<br>(b) $7.4 \times 10^4$ $M^{-1}$ (7- $Hg^{2+}$ ) | (a) Turn-Off fluorescence<br>(b) Turn-Off fluorescence | This work |

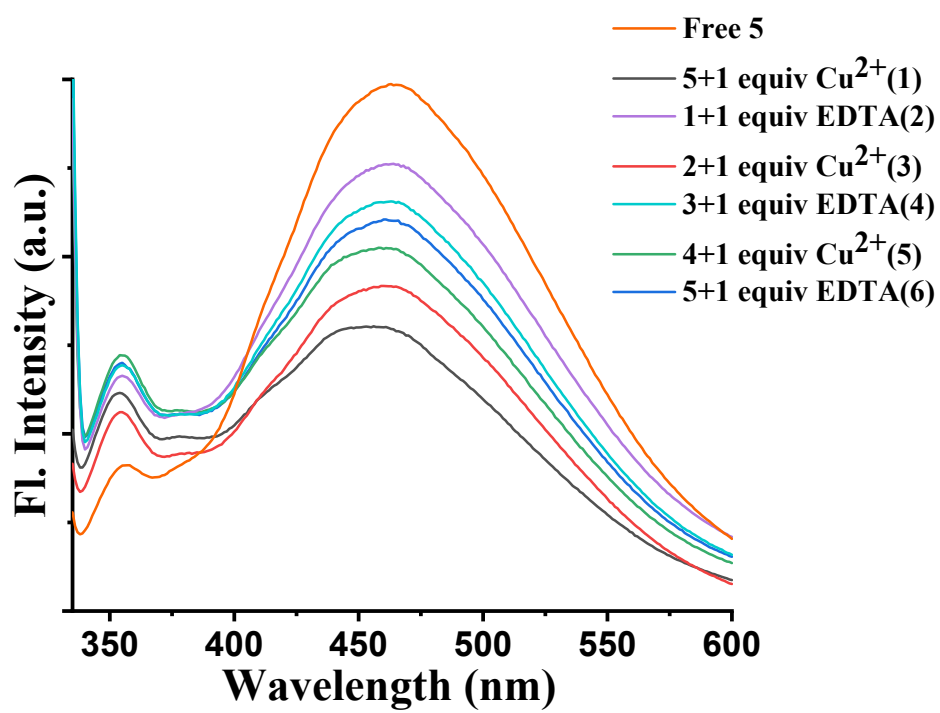

**Fig. S30** Reversibility test of compound **5** ( $7.8 \times 10^{-6}$  M) with  $\text{Cu}^{2+}$  ion in presence of EDTA in DMSO:H<sub>2</sub>O (7:3, v/v) solvent at 22 °C.

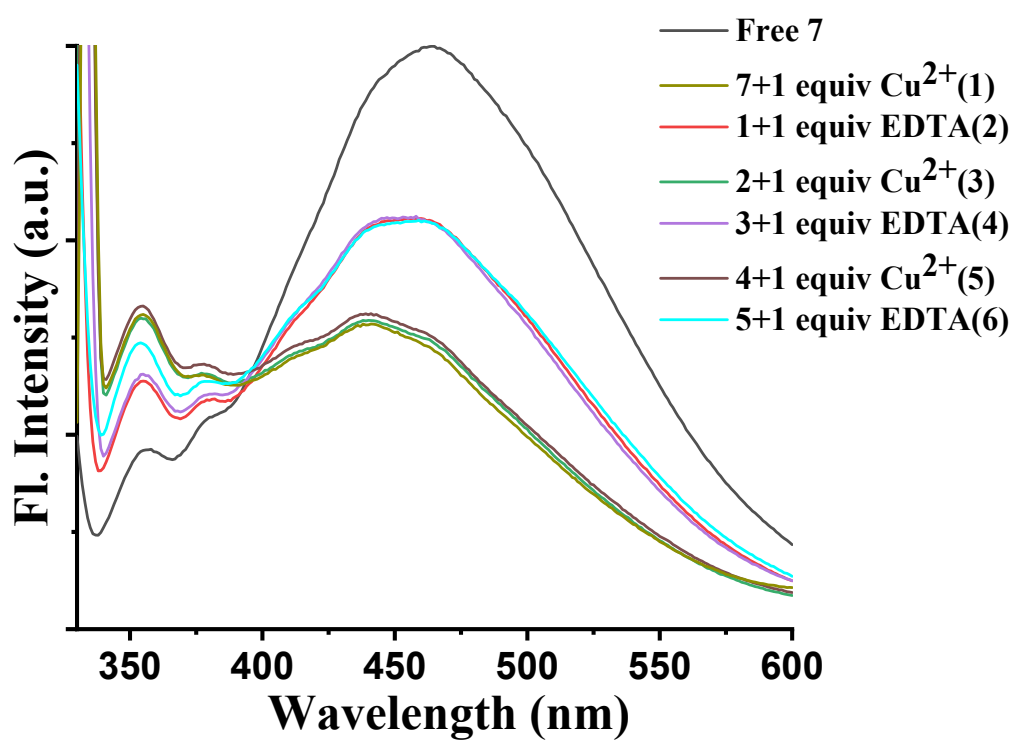

**Fig. S31** Reversibility test of compound **7** ( $7.8 \times 10^{-6}$  M) with  $\text{Cu}^{2+}$  ion in presence of EDTA in DMSO:H<sub>2</sub>O (7:3, v/v) solvent at 22 °C.

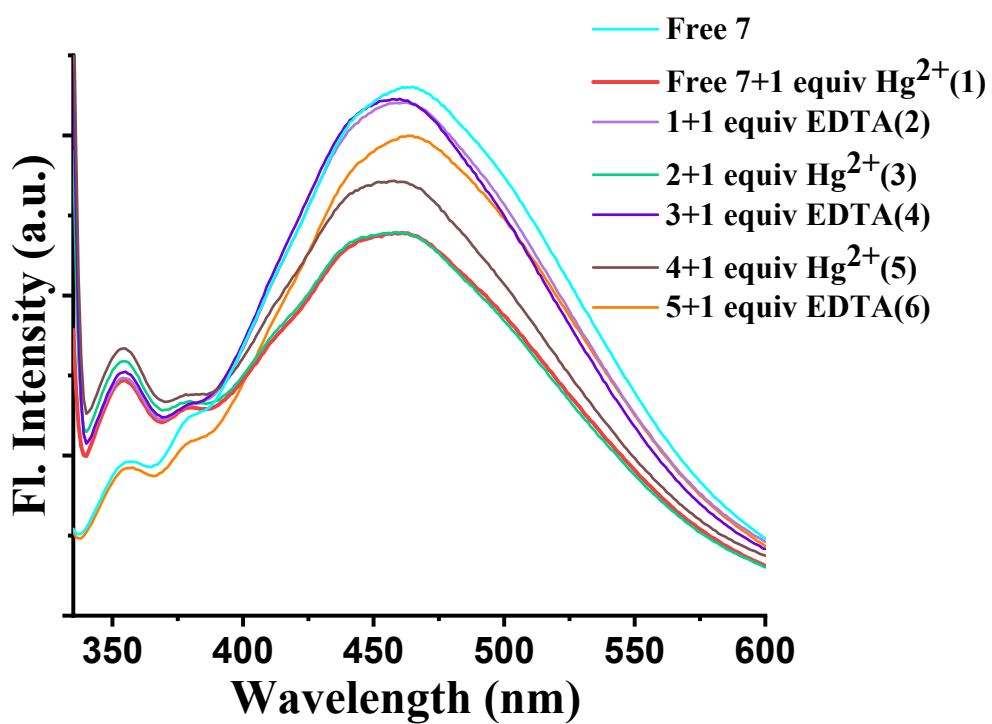

**Fig. S32** Reversibility test of compound **7** ( $7.8 \times 10^{-6}$  M) with Hg<sup>2+</sup> ion in presence of EDTA in DMSO:H<sub>2</sub>O (7:3, v/v) solvent at 22 °C.

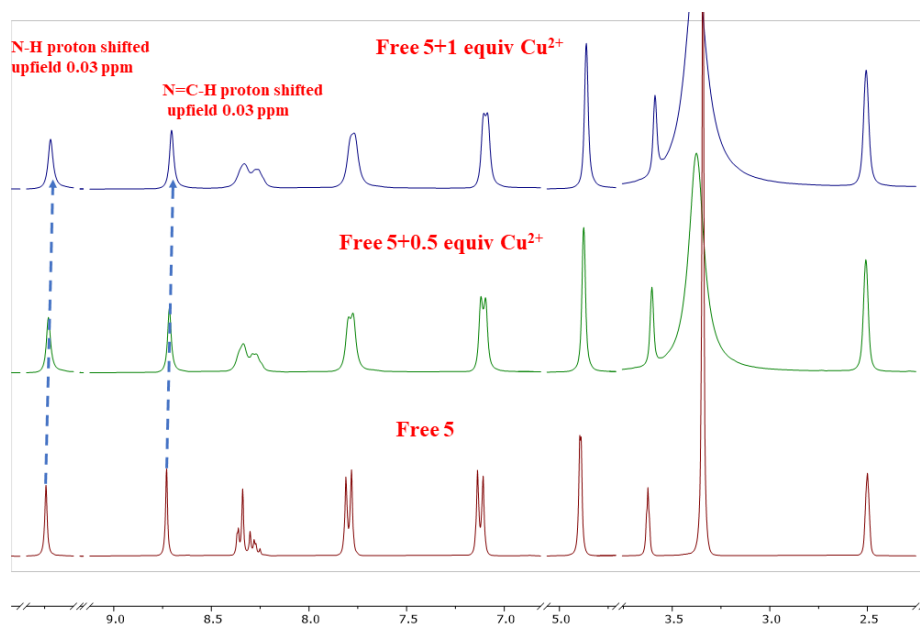

**Fig. S33** <sup>1</sup>H NMR titration of ligand **5** with addition of up to 1 equiv of Cu<sup>2+</sup> ion in DMSO-d<sub>6</sub>.



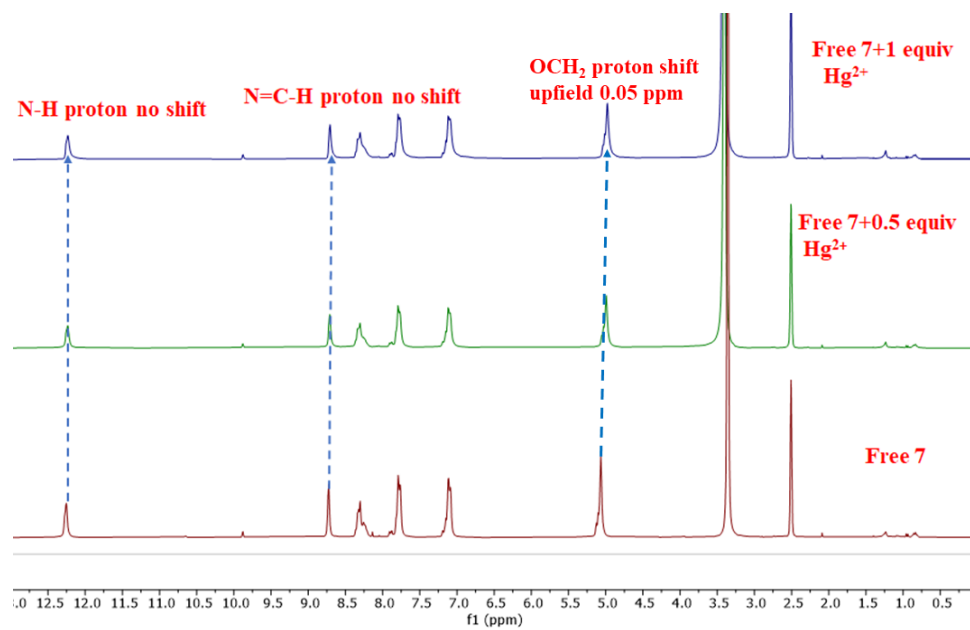

**Fig. S34** <sup>1</sup>H NMR titration of ligand 7 with addition of up to 1 equiv of Hg<sup>2+</sup> ion in DMSO-d<sub>6</sub> medium.

(a)

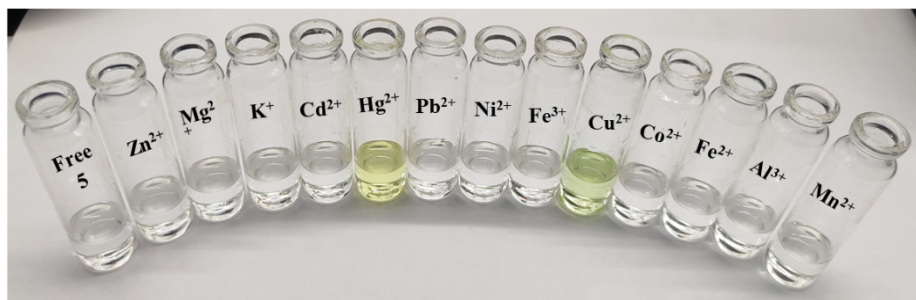

(b)

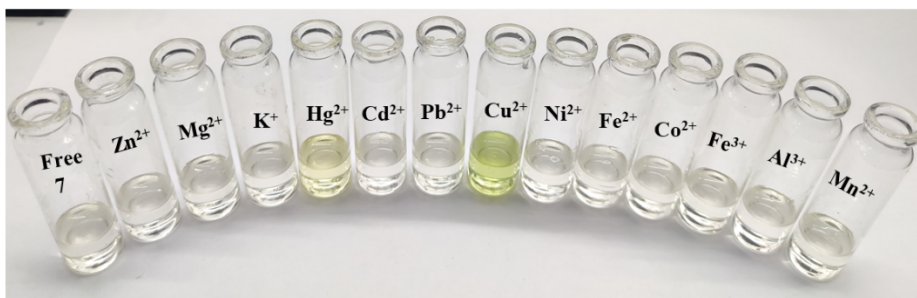

**Fig. S35** Naked eye detection of  $\text{Hg}^{2+}$  and  $\text{Cu}^{2+}$  among all other metal ions ( $1 \times 10^{-5}$  M) by compounds (a) **5** and (b) **7** ( $1 \times 10^{-3}$  M) in DMSO solvent.

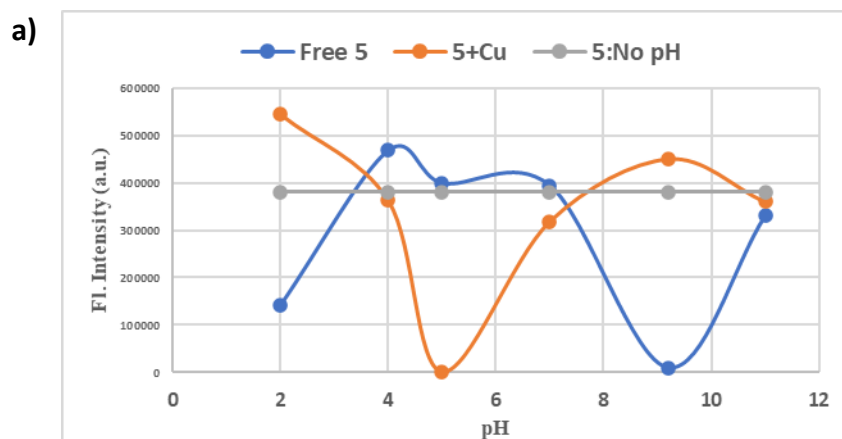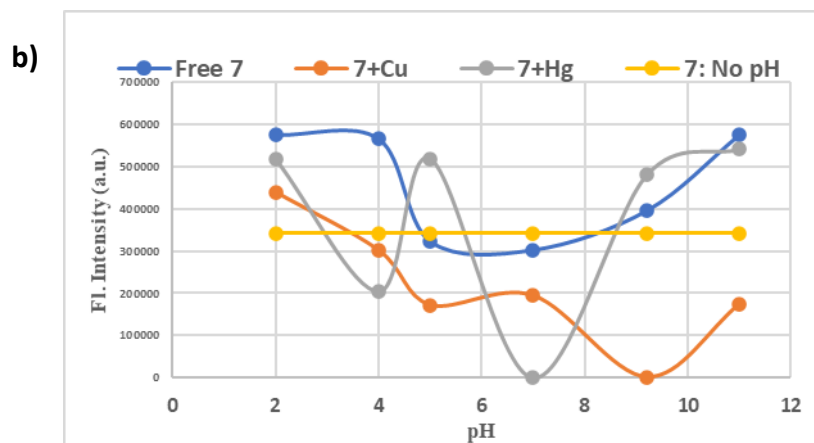

**Fig. S36** Variation of fluorescence intensity with pH in (a) Free **5** and **5**+Cu<sup>2+</sup>, (b) Free **7**, **7**+Cu<sup>2+</sup> and **7**+Hg<sup>2+</sup> in DMSO solvent at 22 °C.

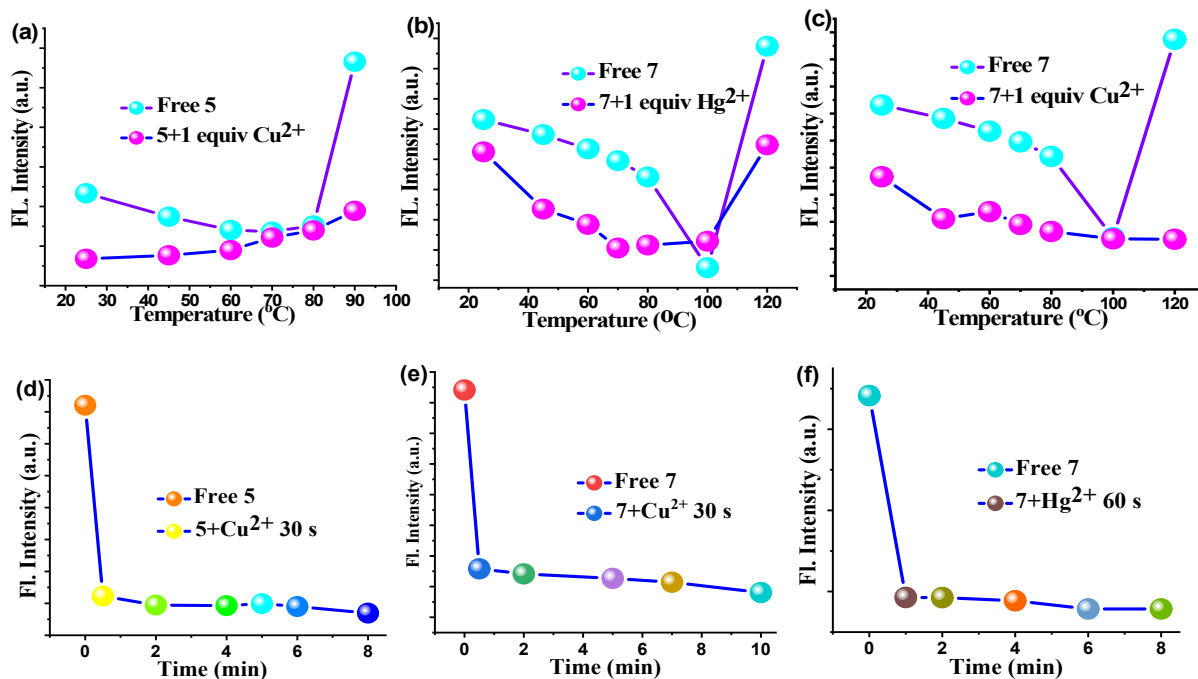

**Fig. S37** Variation of fluorescence intensity with temperature in (a) Free **5** and **5**+ $\text{Cu}^{2+}$ , (b) Free **7** and **7**+ $\text{Hg}^{2+}$  in DMSO solvent at 22  $^{\circ}\text{C}$  and (c) Free **7** and **7**+ $\text{Cu}^{2+}$  and variation of fluorescence intensity with response time of (d) **5** for  $\text{Cu}^{2+}$ , (e) **7** for  $\text{Cu}^{2+}$  and (f) **7** for  $\text{Hg}^{2+}$  in DMSO solvent at 22  $^{\circ}\text{C}$ .

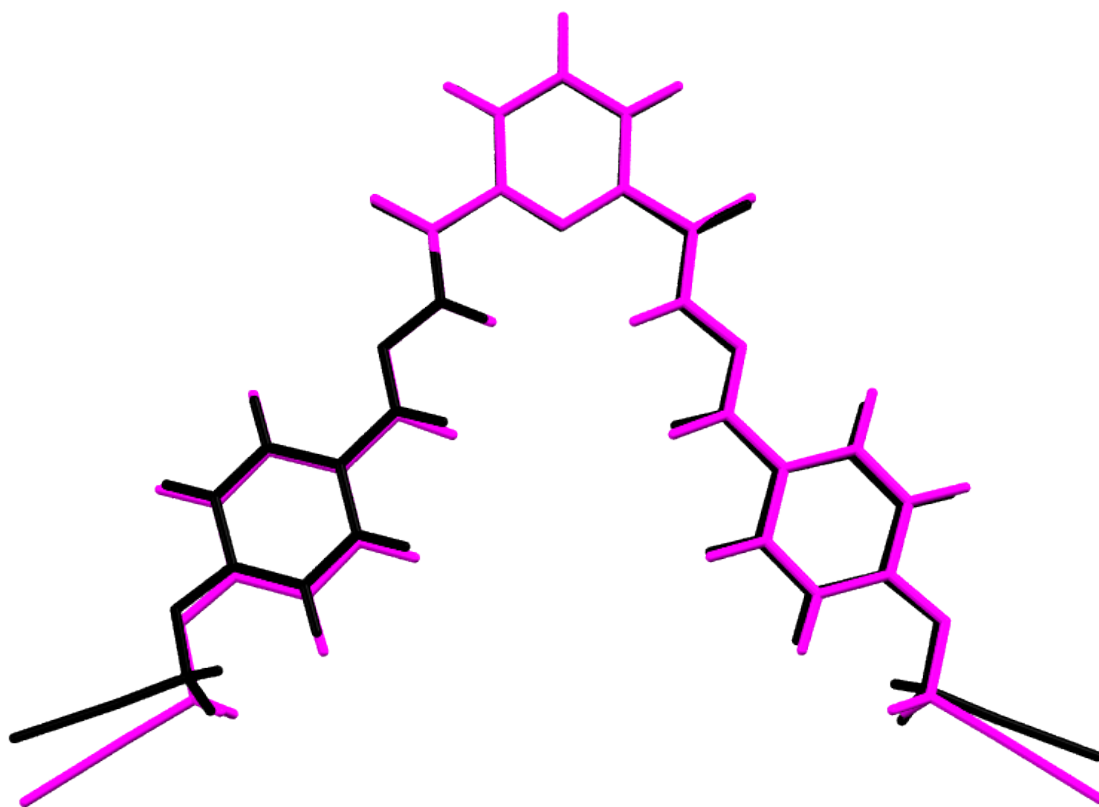

**Fig. S38** Overlay of X-ray crystal structure and DFT optimized structure of receptor **5**. (Crystal structure obtained from XRD is shown in black color, and DFT optimized structure is shown in magenta color.)

**Table S3.** The selected distances (Å) of receptors **5** and **7** calculated at B3LYP/6-311g(d)/cpcm (acetonitrile) level (The labeled primary binding core of both receptors **5** (left) and **7** (right) are shown above the table).

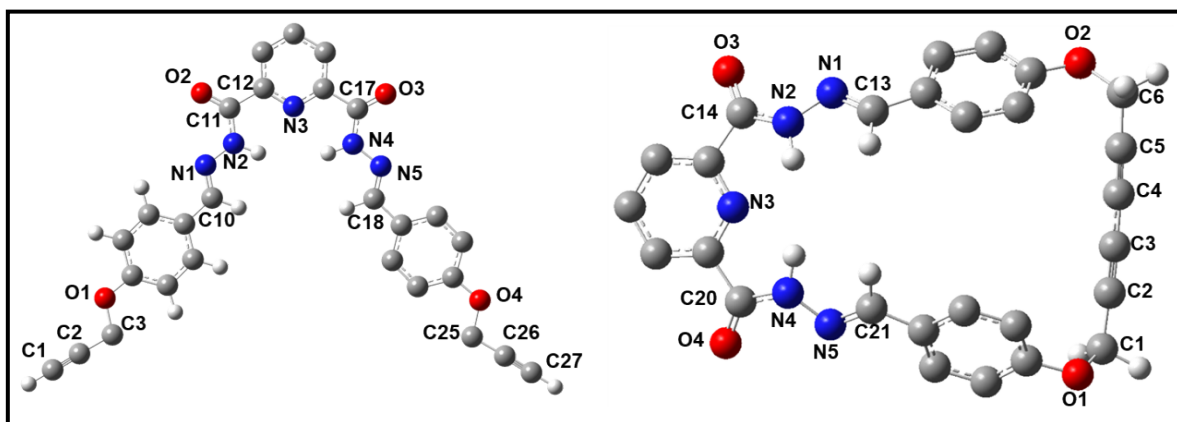

| Receptor [5]     | contact        | Distance (Å)   |
|------------------|----------------|----------------|
|                  | C1-C2          | 1.20120        |
|                  | C2-C3          | 1.45721        |
|                  | C3-O1          | 1.43501        |
|                  | C10-N1         | 1.28331        |
|                  | N1-N2          | 1.36129        |
|                  | N2-C11         | 1.36383        |
|                  | C12-N3         | 1.33802        |
|                  | C11-O2         | 1.22191        |
|                  | C17-N4         | 1.36383        |
|                  | C17-O3         | 1.22191        |
|                  | N4-N5          | 1.36129        |
|                  | N5-C18         | 1.28331        |
|                  | O4-C25         | 1.43501        |
|                  | C25-C26        | 1.45721        |
|                  | C26-C27        | 1.20120        |
|                  | <b>N2-N4</b>   | <b>4.58178</b> |
| <b>N2H-N4H</b>   | <b>2.68537</b> |                |
| <b>N2-N3</b>     | <b>2.70241</b> |                |
| <b>N3-N4</b>     | <b>2.70241</b> |                |
| <b>N1-N5</b>     | <b>6.72499</b> |                |
| <b>C10-C18</b>   | <b>6.21463</b> |                |
| <b>C10H-C18H</b> | <b>4.15275</b> |                |

| Receptor [7]     | contact        | Distance (Å)   |
|------------------|----------------|----------------|
|                  | O1-C1          | 1.44165        |
|                  | C1-C2          | 1.46116        |
|                  | C2-C3          | 1.21151        |
|                  | C3-C4          | 1.36336        |
|                  | C4-C5          | 1.21123        |
|                  | C5-C6          | 1.46086        |
|                  | C6-O2          | 1.43574        |
|                  | C13-N1         | 1.28535        |
|                  | N1-N2          | 1.37255        |
|                  | N2-C14         | 1.36563        |
|                  | C14-O3         | 1.22013        |
|                  | C20-N4         | 1.36600        |
|                  | C20-O4         | 1.21987        |
|                  | N4-N5          | 1.36923        |
|                  | N5-C21         | 1.28452        |
|                  | <b>N2-N4</b>   | <b>4.36916</b> |
| <b>N2H-N4H</b>   | <b>2.47027</b> |                |
| <b>N2-N3</b>     | <b>2.64242</b> |                |
| <b>N3-N4</b>     | <b>2.63921</b> |                |
| <b>N1-N5</b>     | <b>5.93003</b> |                |
| <b>C21-C13</b>   | <b>5.05133</b> |                |
| <b>C10H-C18H</b> | <b>3.31883</b> |                |

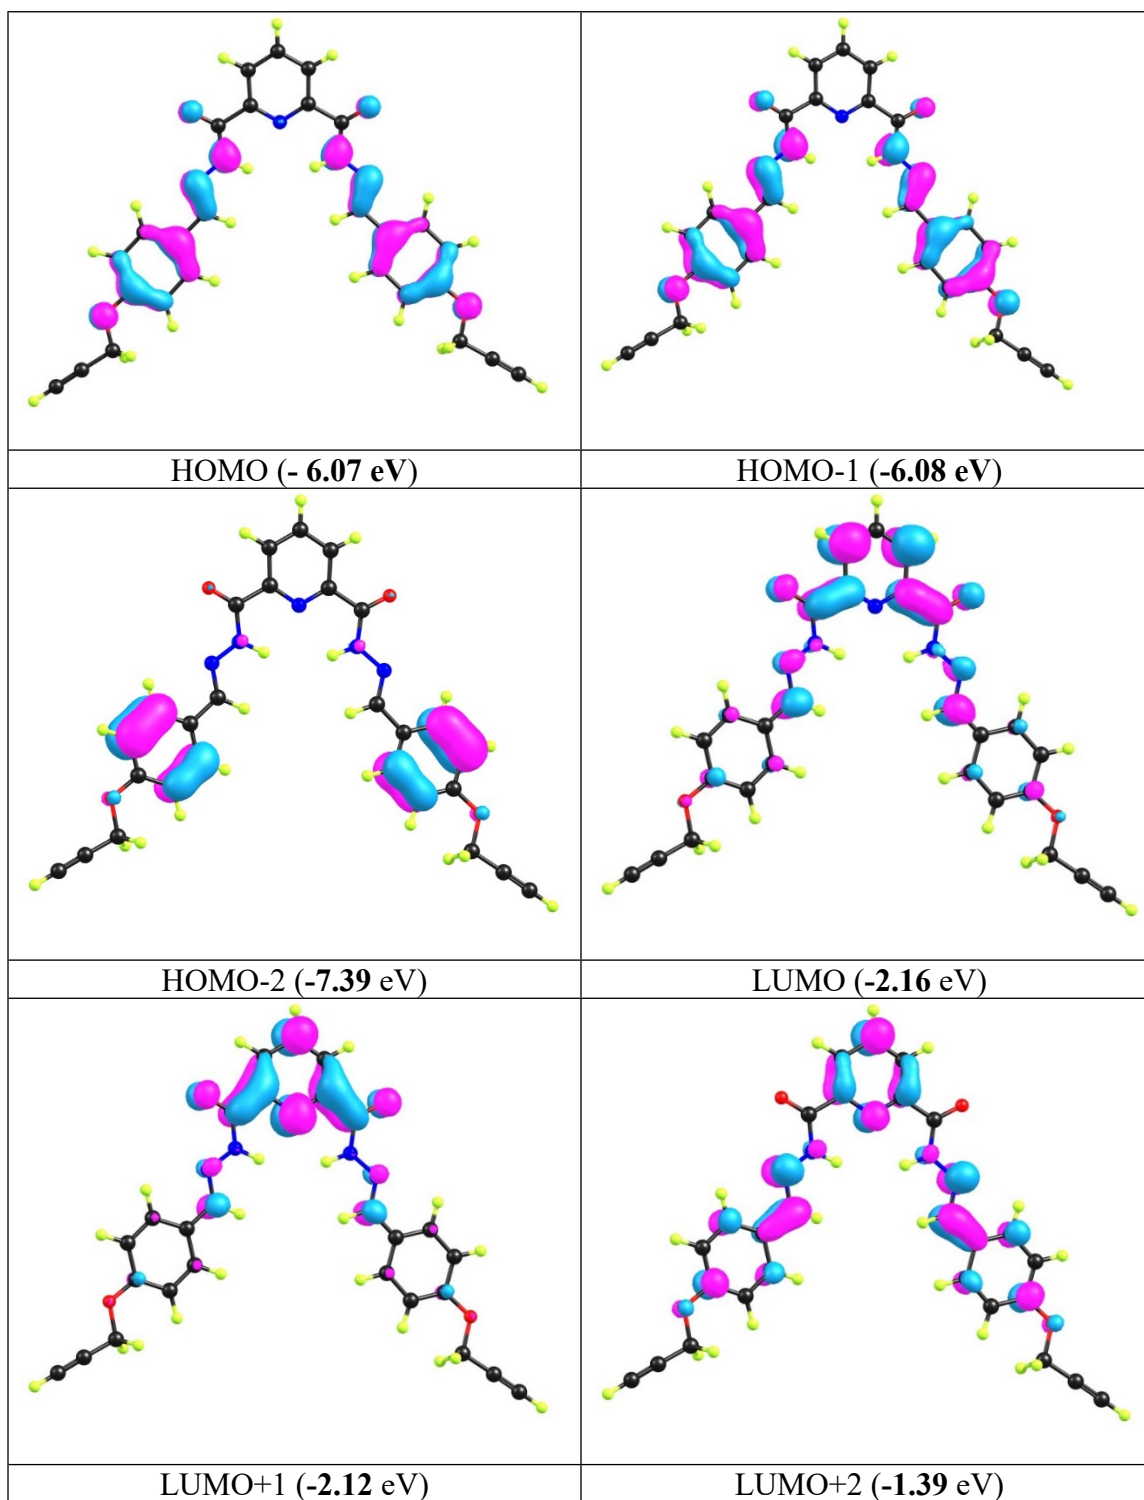

**Fig. S39** Frontiers MOs of the acyclic receptor **5** with corresponding energy values in parenthesis. (isosurface value= 0.04)

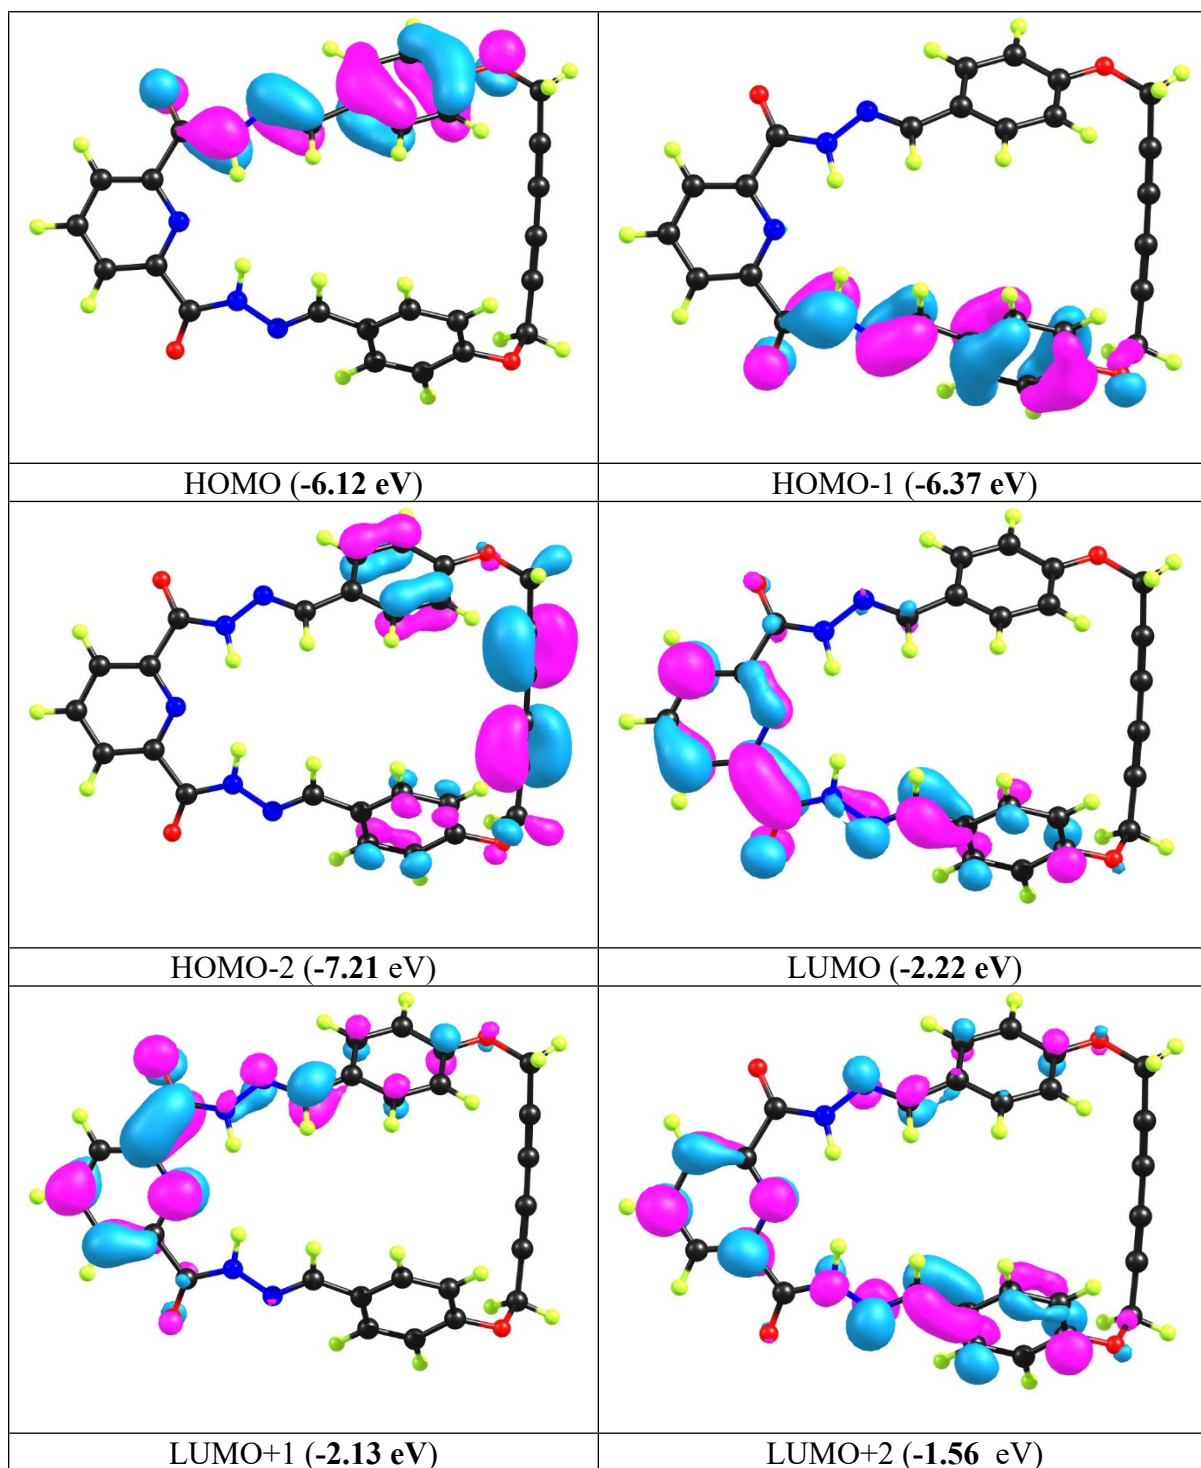

**Fig. S40** Frontiers MOs of the cyclic receptor **7** with corresponding energy values in parenthesis. (isosurface value = 0.04).



**Table S4.** The selected distances (Å) of complex  $[5 \cdot \text{Cu}(\text{ClO}_4)_2]$  calculated at B3LYP/6-311g(d)/lanl2dz(Cu)/cpcm(acetonitrile) level (The labeled primary binding core of complex  $[5 \cdot \text{Cu}(\text{ClO}_4)_2]$  is shown at the left side of the table).

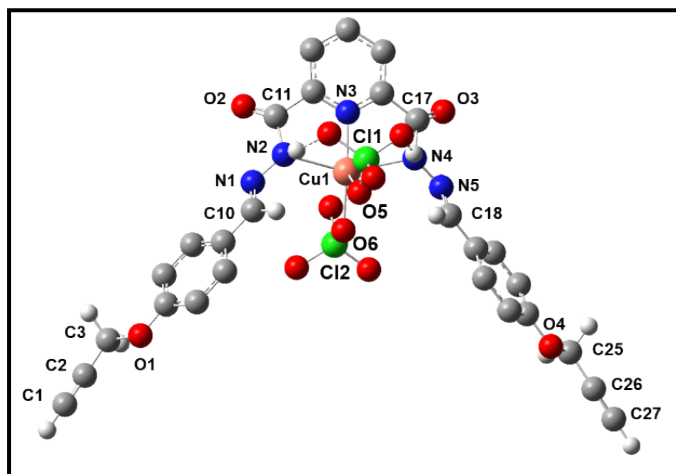

| Complex $[5 \cdot \text{Cu}^{2+} \cdot (\text{ClO}_4)_2]$ | contact | Distance (Å) |
|-----------------------------------------------------------|---------|--------------|
|                                                           | C1-C2   | 1.20100      |
|                                                           | C2-C3   | 1.45611      |
|                                                           | C3-O1   | 1.43968      |
|                                                           | C10-N1  | 1.28805      |
|                                                           | N1-N2   | 1.38611      |
|                                                           | N2-C11  | 1.43524      |
|                                                           | C11-O2  | 1.19948      |
|                                                           | C17-N4  | 1.43518      |
|                                                           | C17-O3  | 1.19949      |
|                                                           | N4-N5   | 1.38611      |
|                                                           | N5-C18  | 1.28804      |
|                                                           | O4-C25  | 1.43967      |
|                                                           | C25-C26 | 1.45611      |
|                                                           | C26-C27 | 1.20100      |
|                                                           | N2-Cu1  | 2.29963      |
| N3-Cu1                                                    | 1.98024 |              |
| N4-Cu1                                                    | 2.30009 |              |
| O5-Cu1                                                    | 2.36077 |              |
| O6-Cu1                                                    | 1.97125 |              |

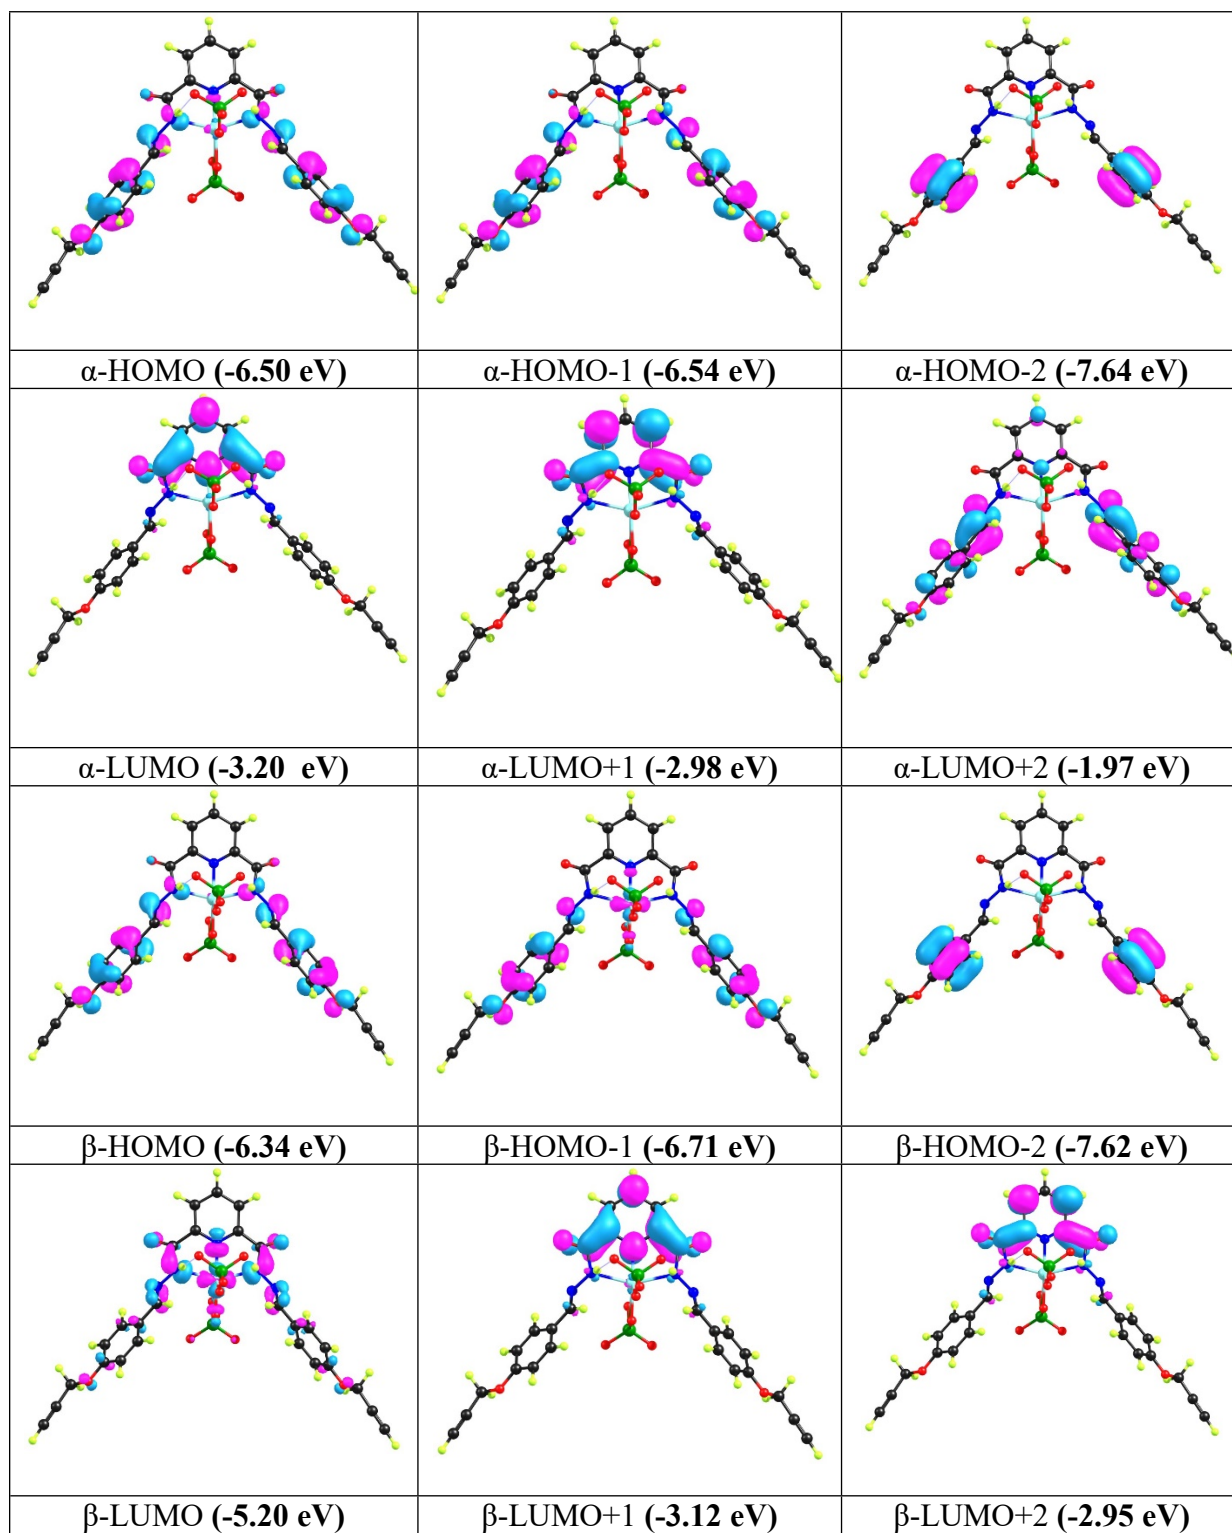

**Fig. S41** Frontiers MOs of the complex  $[5 \cdot \text{Cu}(\text{ClO}_4)_2]$  with corresponding energy values in parenthesis. (isosurface value= 0.04).

**Table S5** The selected distances (Å) of complexes  $[7 \cdot \text{Hg}^{2+}]$  (left sided alkyne unit) and  $[7 \cdot \text{Hg}^{2+}]$  (left sided alkyne unit) calculated at B3LYP/6-311g(d)/lanl2dz(Hg)/cpcm (acetonitrile) level (The zoomed portions of the primary binding core of  $[7 \cdot \text{Hg}^{2+}]$  (left) and  $[7 \cdot \text{Hg}^{2+}]$  (right) with atom labeling are shown above the table).

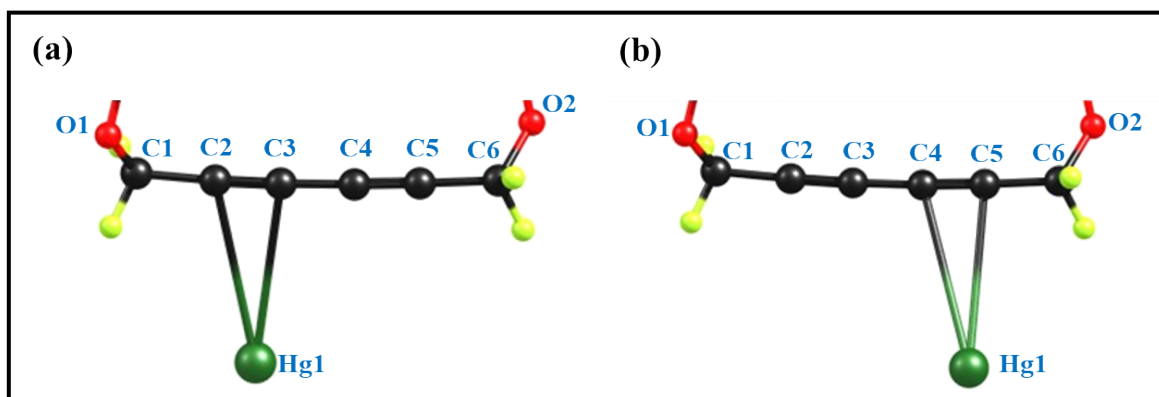

| <i>Receptor</i> $[7 \cdot \text{Hg}^{2+}]$ |                       |                        |
|--------------------------------------------|-----------------------|------------------------|
| contact                                    | Left side alkyne unit | Right side alkyne unit |
|                                            | distance(Å)           | distance(Å)            |
| <b>C1-O1</b>                               | 1.43988               | 1.44038                |
| <b>C1-C2</b>                               | 1.46266               | 1.46169                |
| <b>C2-C3</b>                               | 1.21292               | 1.21154                |
| <b>C3-C4</b>                               | 1.36375               | 1.36346                |
| <b>C4-C5</b>                               | 1.21126               | 1.21245                |
| <b>C5-C6</b>                               | 1.46148               | 1.46242                |
| <b>C6-O2</b>                               | 1.43431               | 1.43355                |
| <b>C2-Hg1</b>                              | 3.67708               | -----                  |
| <b>C3-Hg1</b>                              | 3.60429               | -----                  |
| <b>C4-Hg1</b>                              | -----                 | 3.73262                |
| <b>C5-Hg1</b>                              | -----                 | 3.61795                |

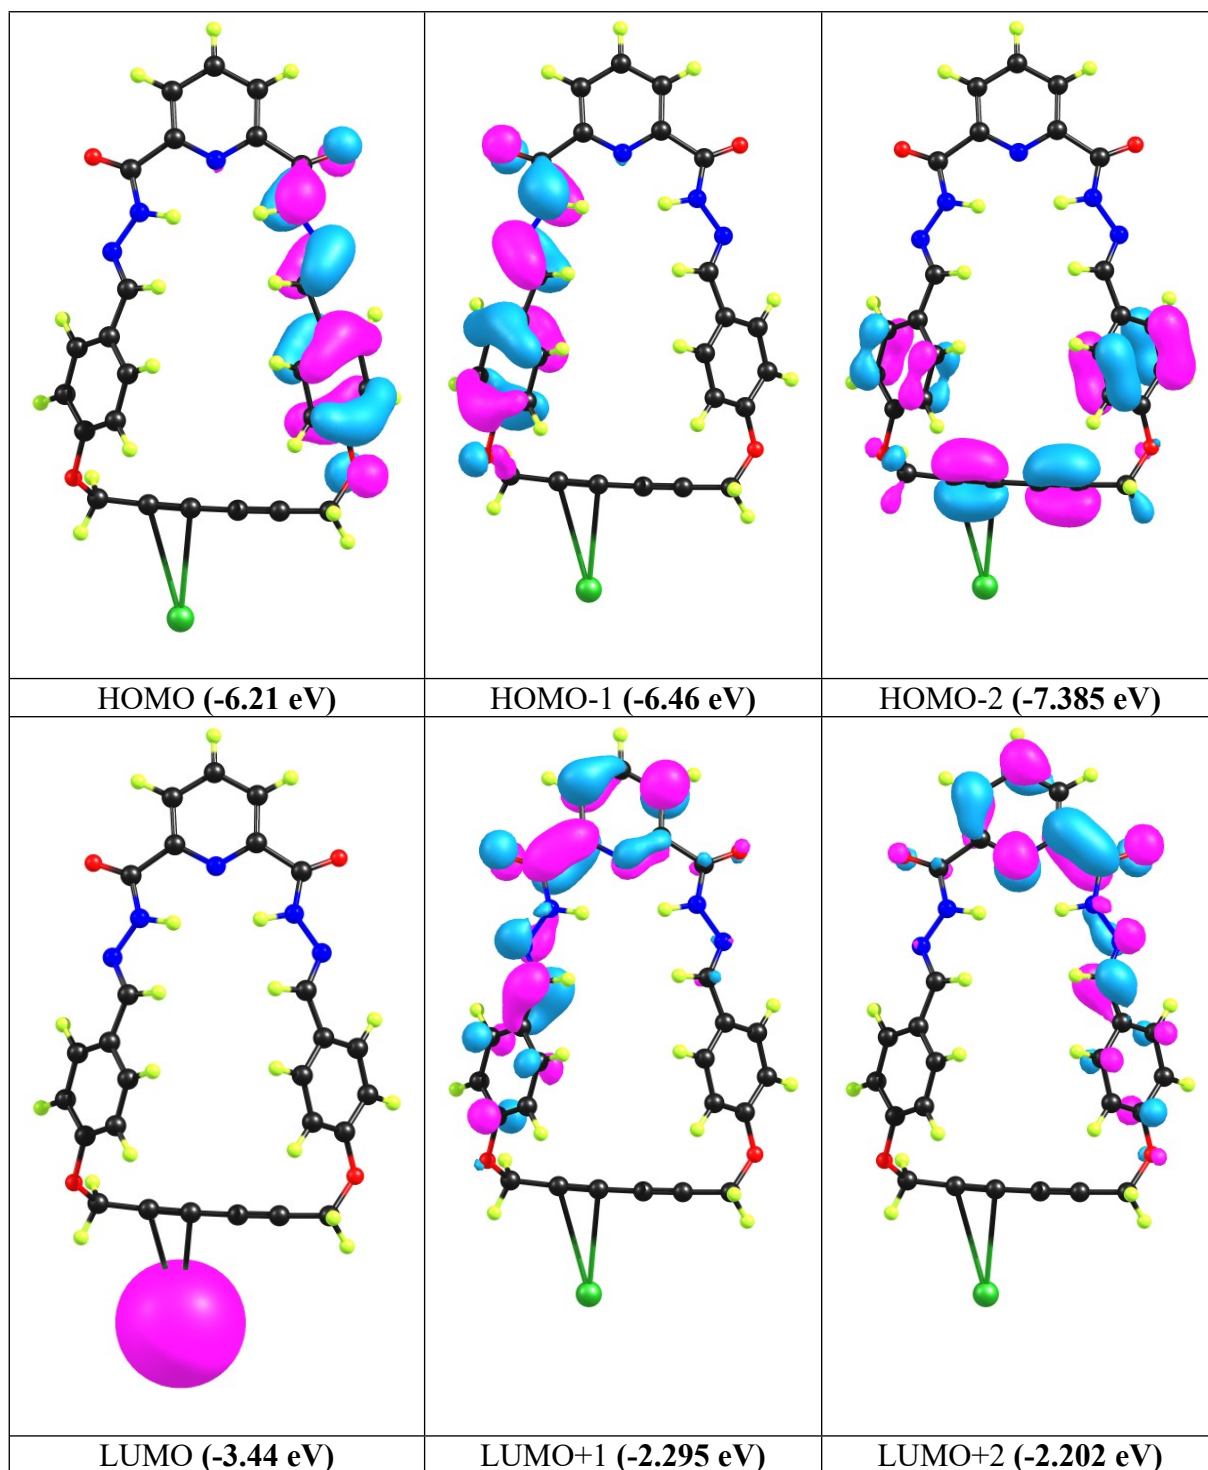

**Fig. S42** Frontiers MOs of the complex  $[7 \cdot \text{Hg}^{2+}]$  (left sided alkyne unit) with corresponding energy values in parenthesis (isosurface value= 0.04)

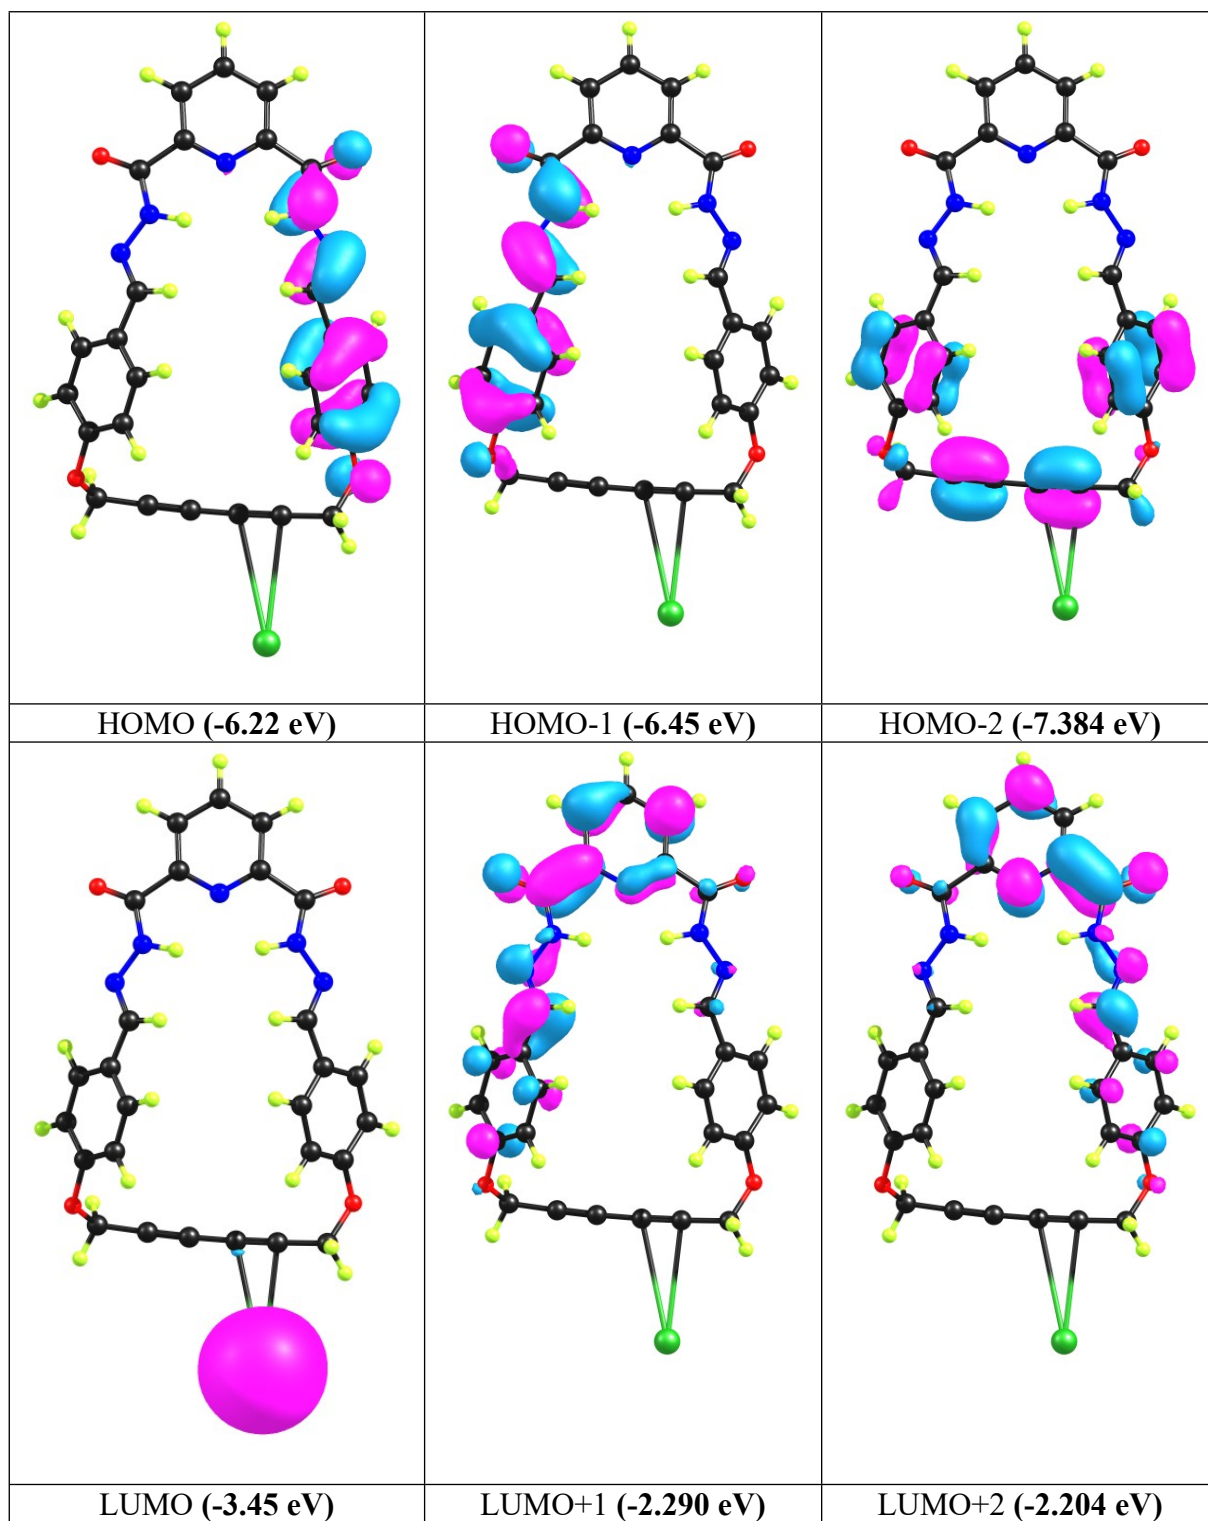

**Fig. S43** Frontiers MOs of the complex  $[7 \cdot \text{Hg}^{2+}]$  (right sided alkyne unit) with corresponding energy values in parenthesis (isosurface value= 0.04)

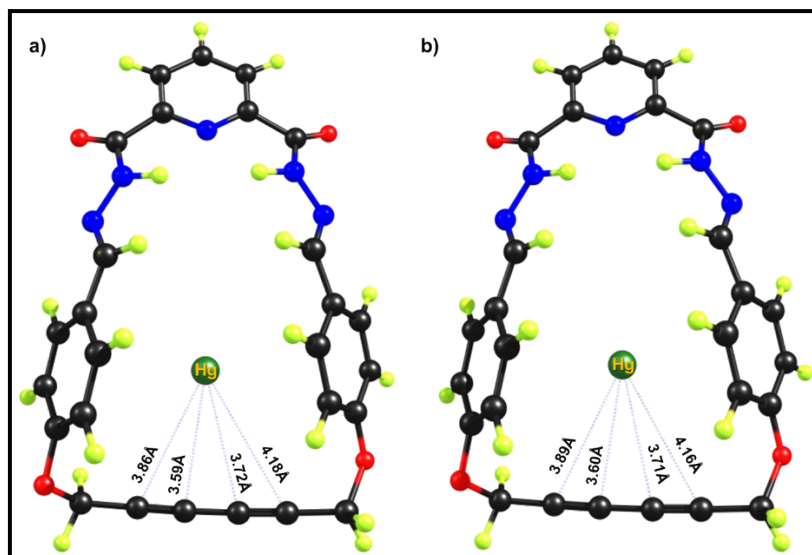

**Fig. S44** Optimized structure of the complexes considering endocyclic binding mode: **a)**  $[7 \cdot \text{Hg}^{2+}]$  (left sided alkyne unit), and **b)**  $[7 \cdot \text{Hg}^{2+}]$  (right sided alkyne unit).

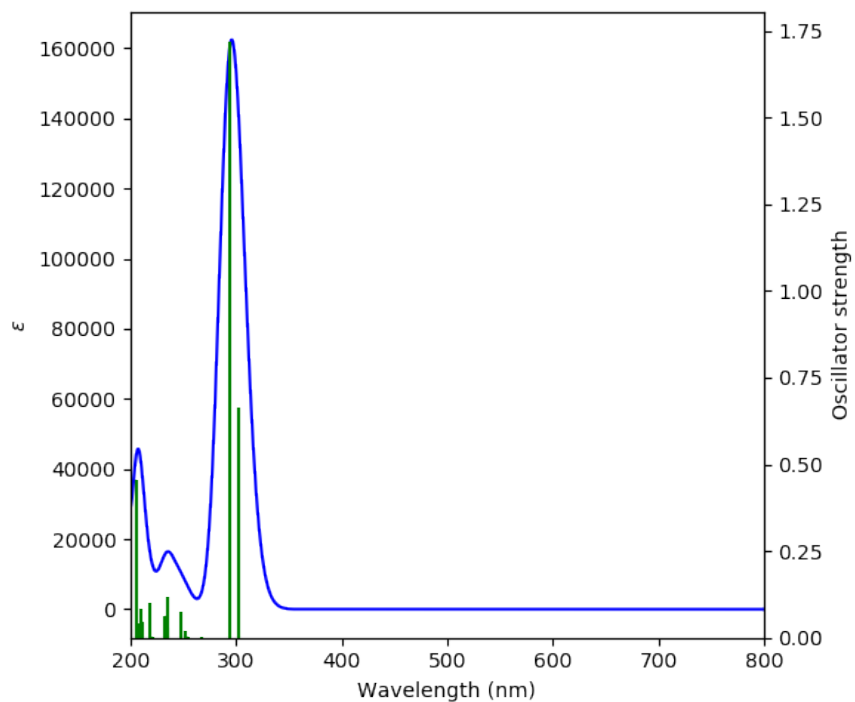

**Fig. S45** Calculated absorption spectrum of the acyclic receptor **5**

**Table S6** Major excited state transitions of the acyclic receptor **5** with Osc. Strength and  $\lambda_{\text{ex}}$ .

| $\lambda_{\text{ex}}$ (nm)<br>(Exp.) <sup>a</sup> | $\lambda_{\text{ex}}$ (nm)<br>(Calc.) <sup>b</sup> | Oscillator<br>Strength (f) | Major Transitions <sup>c</sup>                                                       |
|---------------------------------------------------|----------------------------------------------------|----------------------------|--------------------------------------------------------------------------------------|
| 321                                               | 293.7                                              | 1.7195                     | H-1 $\rightarrow$ L+1 (35%), H $\rightarrow$ L (45%)                                 |
| 263                                               | 235.6                                              | 0.1162                     | H-1 $\rightarrow$ L (12%), H-1 $\rightarrow$ L+3 (31%),<br>H $\rightarrow$ L+2 (36%) |

<sup>a</sup>Experimental wavelength in DMSO. <sup>b</sup>TD-DFT calculated wavelength of acyclic receptor **5** in DMSO. <sup>c</sup>Transitions with greater than 10% contribution are represented.

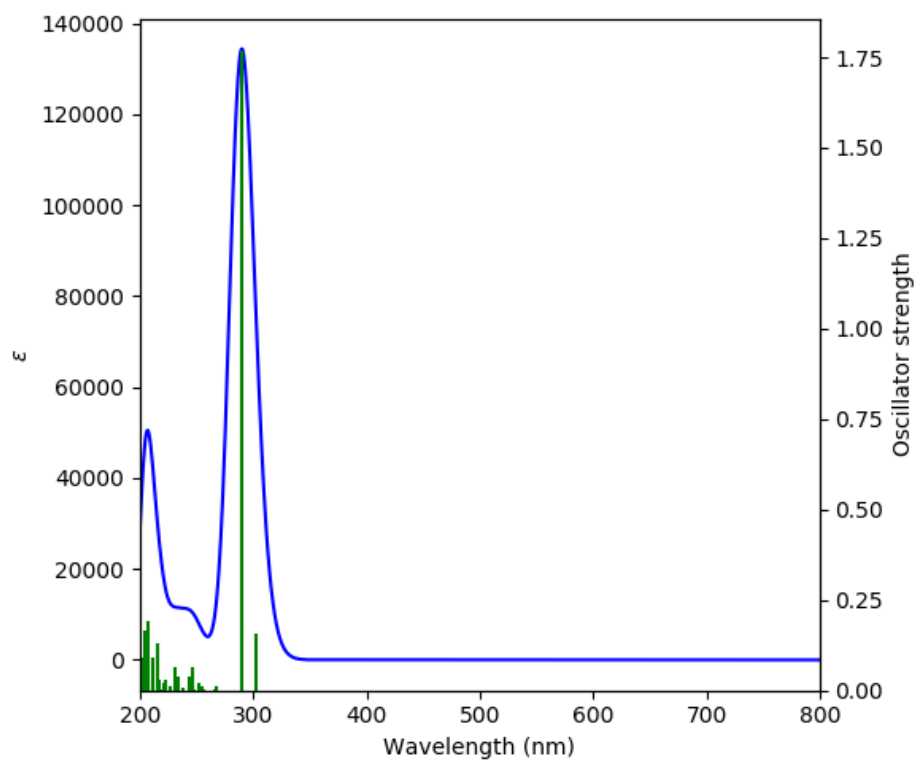

**Fig. S46** Calculated absorption spectrum of the cyclic receptor **7**.

**Table S7** Major excited state transitions of the cyclic receptor **7** with Osc. Strength and  $\lambda_{\text{ex}}$ .

| $\lambda_{\text{ex}}$ (nm)<br>(Exp.) <sup>a</sup>                                                                                                                                                         | $\lambda_{\text{ex}}$ (nm)<br>(Calc.) <sup>b</sup> | Oscillator<br>Strength (f) | Major Transitions <sup>c</sup>                                                   |
|-----------------------------------------------------------------------------------------------------------------------------------------------------------------------------------------------------------|----------------------------------------------------|----------------------------|----------------------------------------------------------------------------------|
| 321                                                                                                                                                                                                       | 289.4                                              | 1.769                      | H-1 $\rightarrow$ L (53%), H-1 $\rightarrow$ L+1 (9%), H $\rightarrow$ L+1 (17%) |
| <sup>a</sup> Experimental wavelength in DMSO. <sup>b</sup> TD-DFT calculated wavelength of cyclic receptor <b>7</b> in DMSO. <sup>c</sup> Transitions with greater than 10% contribution are represented. |                                                    |                            |                                                                                  |



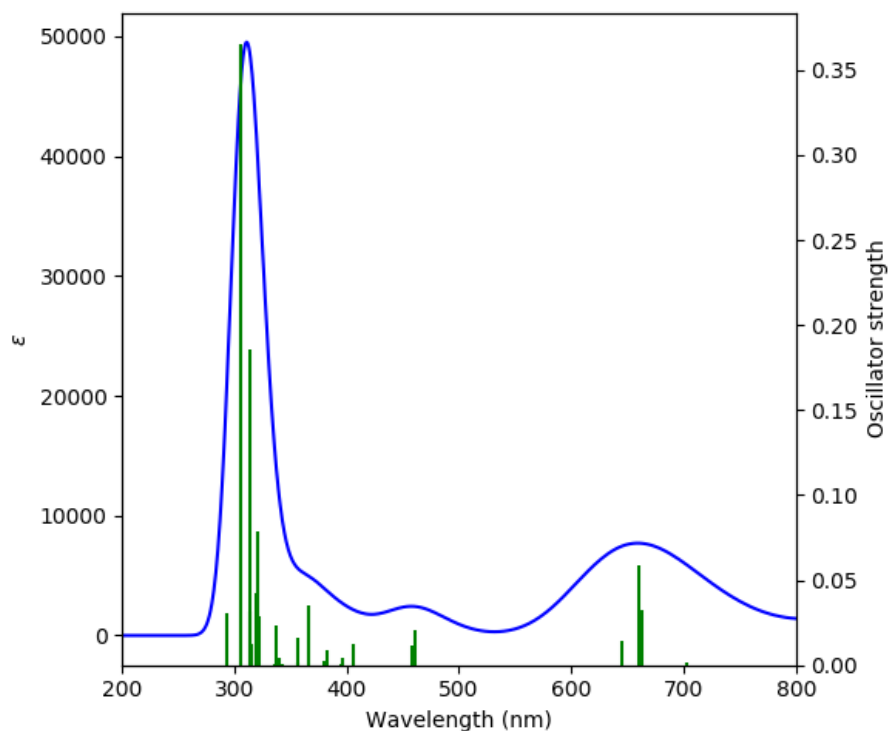

**Fig. S47** Calculated absorption spectrum of the complex  $[5 \cdot \text{Cu}(\text{ClO}_4)_2]$

**Table S8** Major excited state transitions of the complex  $[5 \cdot \text{Cu}(\text{ClO}_4)_2]$  with Osc. Strength and  $\lambda_{\text{ex}}$ .

| $\lambda_{\text{ex}}$ (nm)<br>(Exp.) <sup>a</sup>                                                                                                                                                                              | $\lambda_{\text{ex}}$ (nm)<br>(Calc.) <sup>b</sup> | Oscillator<br>Strength (f) | Major Transitions <sup>c</sup>                 |
|--------------------------------------------------------------------------------------------------------------------------------------------------------------------------------------------------------------------------------|----------------------------------------------------|----------------------------|------------------------------------------------|
| 321                                                                                                                                                                                                                            | 305.9                                              | 0.3656                     | H-1(B)->L+1(B) (23%), HOMO(B)->L+2(B)<br>(42%) |
| <sup>a</sup> Experimental wavelength in DMSO. <sup>b</sup> TD-DFT calculated wavelength of complex $[5 \cdot \text{Cu}(\text{ClO}_4)_2]$ in DMSO. <sup>c</sup> Transitions with greater than 10% contribution are represented. |                                                    |                            |                                                |

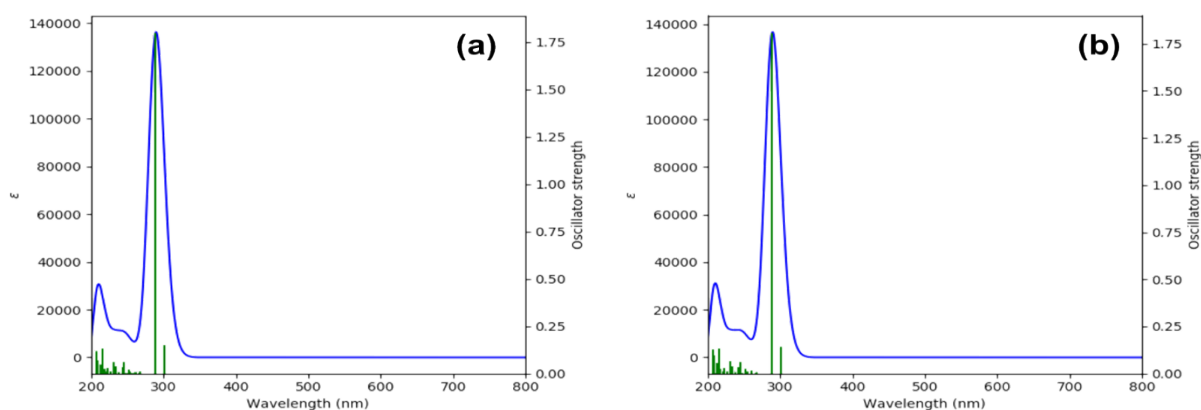

**Fig. S48** Calculated absorption spectrum of the complex (a):  $[7 \cdot \text{Hg}^{2+}]$  (left side); (b):  $[7 \cdot \text{Hg}^{2+}]$  (right side).

**Table S9** Major excited state transitions of the complex  $[7 \cdot \text{Hg}^{2+}]$  (involving left-sided alkyne as a binding unit) with Osc. Strength and  $\lambda_{\text{ex}}$ .

| $\lambda_{\text{ex}}$ (nm)<br>(Exp.) <sup>a</sup>                                                                                                                                                                                 | $\lambda_{\text{ex}}$ (nm)<br>(Calc.) <sup>b</sup> | Oscillator<br>Strength (f) | Major Transitions <sup>c</sup>  |
|-----------------------------------------------------------------------------------------------------------------------------------------------------------------------------------------------------------------------------------|----------------------------------------------------|----------------------------|---------------------------------|
| 321                                                                                                                                                                                                                               | 289.1                                              | 1.7992                     | H-1->L+1 (53%), HOMO->L+2 (18%) |
| <sup>a</sup> Experimental wavelength in DMSO. <sup>b</sup> TD-DFT calculated wavelength of complex $7 \cdot \text{Hg}^{2+}$ ( <i>left</i> ) in DMSO. <sup>c</sup> Transitions with greater than 10% contribution are represented. |                                                    |                            |                                 |

**Table S10** Major excited state transitions of the complex  $[7 \cdot \text{Hg}^{2+}]$  (involving right-sided alkyne as a binding unit) with Osc. Strength and  $\lambda_{\text{ex}}$ .

| $\lambda_{\text{ex}}$ (nm)<br>(Exp.) <sup>a</sup>                                                                                                                                                                                  | $\lambda_{\text{ex}}$ (nm)<br>(Calc.) <sup>b</sup> | Oscillator<br>Strength (f) | Major Transitions <sup>c</sup>  |
|------------------------------------------------------------------------------------------------------------------------------------------------------------------------------------------------------------------------------------|----------------------------------------------------|----------------------------|---------------------------------|
| 321                                                                                                                                                                                                                                | 289.08                                             | 1.8078                     | H-1->L+1 (51%), HOMO->L+2 (19%) |
| <sup>a</sup> Experimental wavelength in DMSO. <sup>b</sup> TD-DFT calculated wavelength of complex $7 \cdot \text{Hg}^{2+}$ ( <i>right</i> ) in DMSO. <sup>c</sup> Transitions with greater than 10% contribution are represented. |                                                    |                            |                                 |

**Table S11** DFT Optimized coordinates of all the compounds

| Receptor 5 (Acyclic) |              |              |   |             |              |              |
|----------------------|--------------|--------------|---|-------------|--------------|--------------|
| C                    | -0.000014000 | 6.788843000  | - | H           | 7.559683000  | -0.902606000 |
| 0.000029000          |              |              |   | 0.000564000 |              |              |
| H                    | -0.000017000 | 7.872722000  | - | C           | 6.151638000  | -2.523064000 |
| 0.000045000          |              |              |   | 0.000228000 |              |              |
| C                    | 1.197266000  | 6.082655000  |   | C           | 4.802129000  | -2.885547000 |
| 0.000194000          |              |              |   | 0.000739000 |              |              |
| H                    | 2.158046000  | 6.579698000  |   | H           | 4.494441000  | -3.922954000 |
| 0.000353000          |              |              |   | 0.001097000 |              |              |
| C                    | 1.149371000  | 4.687792000  |   | C           | 3.826519000  | -1.889890000 |
| 0.000205000          |              |              |   | 0.000827000 |              |              |
| N                    | -0.000007000 | 4.002783000  |   | H           | 2.781184000  | -2.182721000 |
| 0.000012000          |              |              |   | 0.001208000 |              |              |
| C                    | 2.452542000  | 3.923529000  |   | O           | 7.195340000  | -3.398110000 |
| 0.000457000          |              |              |   | 0.000079000 |              |              |
| O                    | 3.531826000  | 4.496426000  |   | C           | 6.903412000  | -4.803110000 |
| 0.001071000          |              |              |   | 0.000293000 |              |              |
| N                    | 2.290885000  | 2.569317000  | - | H           | 6.315562000  | -5.065323000 |
| 0.000136000          |              |              |   | 0.886770000 |              |              |
| H                    | 1.342681000  | 2.204501000  | - | H           | 6.314874000  | -5.065449000 |
| 0.000630000          |              |              |   | 0.885688000 |              |              |
| N                    | 3.362494000  | 1.729821000  |   | C           | 8.163609000  | -5.534801000 |
| 0.000014000          |              |              |   | 0.000159000 |              |              |
| C                    | 3.107319000  | 0.472134000  | - | C           | 9.188389000  | -6.161457000 |
| 0.000481000          |              |              |   | 0.000553000 |              |              |
| H                    | 2.076380000  | 0.101232000  | - | H           | 10.099137000 | -6.714842000 |
| 0.001007000          |              |              |   | 0.000885000 |              |              |
| C                    | 4.165342000  | -0.532594000 | - | C           | -1.197290000 | 6.082649000  |
| 0.000408000          |              |              |   | 0.000231000 |              |              |
| C                    | 5.531404000  | -0.186645000 |   | H           | -2.158073000 | 6.579686000  |
| 0.000084000          |              |              |   | 0.000404000 |              |              |
| H                    | 5.812796000  | 0.859852000  |   | C           | -1.149388000 | 4.687786000  |
| 0.000409000          |              |              |   | 0.000200000 |              |              |
| C                    | 6.507199000  | -1.162959000 |   | C           | -2.452555000 | 3.923516000  |
| 0.000172000          |              |              |   | 0.000425000 |              |              |

|             |              |              |   |             |               |              |   |
|-------------|--------------|--------------|---|-------------|---------------|--------------|---|
| O           | -3.531842000 | 4.496407000  | - | C           | -4.802107000  | -2.885572000 |   |
| 0.001092000 |              |              |   | 0.000753000 |               |              |   |
| N           | -2.290891000 | 2.569305000  |   | H           | -4.494413000  | -3.922977000 |   |
| 0.000174000 |              |              |   | 0.001119000 |               |              |   |
| H           | -1.342685000 | 2.204494000  |   | C           | -3.826502000  | -1.889910000 |   |
| 0.000682000 |              |              |   | 0.000852000 |               |              |   |
| N           | -3.362496000 | 1.729803000  |   | H           | -2.781165000  | -2.182736000 |   |
| 0.000006000 |              |              |   | 0.001250000 |               |              |   |
| C           | -3.107314000 | 0.472118000  |   | O           | -7.195314000  | -3.398149000 |   |
| 0.000508000 |              |              |   | 0.000059000 |               |              |   |
| H           | -2.076373000 | 0.101221000  |   | C           | -6.903382000  | -4.803150000 |   |
| 0.001052000 |              |              |   | 0.000289000 |               |              |   |
| C           | -4.165332000 | -0.532616000 |   | H           | -6.315543000  | -5.065353000 |   |
| 0.000423000 |              |              |   | 0.886777000 |               |              |   |
| C           | -5.531396000 | -0.186674000 | - | H           | -6.314831000  | -5.065495000 | - |
| 0.000092000 |              |              |   | 0.885681000 |               |              |   |
| H           | -5.812793000 | 0.859821000  | - | C           | -8.163566000  | -5.534862000 | - |
| 0.000426000 |              |              |   | 0.000173000 |               |              |   |
| C           | -6.507186000 | -1.162993000 | - | C           | -9.188434000  | -6.161375000 | - |
| 0.000191000 |              |              |   | 0.000576000 |               |              |   |
| H           | -7.559671000 | -0.902646000 | - | H           | -10.099545000 | -6.714161000 | - |
| 0.000600000 |              |              |   | 0.000917000 |               |              |   |
| C           | -6.151617000 | -2.523096000 |   |             |               |              |   |
| 0.000220000 |              |              |   |             |               |              |   |

Receptor 7 (Cyclic)

|             |              |              |   |             |              |              |   |
|-------------|--------------|--------------|---|-------------|--------------|--------------|---|
| C           | -6.407551000 | 1.058947000  | - | O           | -4.671760000 | 3.391924000  | - |
| 0.552625000 |              |              |   | 0.620386000 |              |              |   |
| C           | -5.068345000 | 1.066929000  | - | N           | -3.068400000 | 2.184737000  |   |
| 0.163472000 |              |              |   | 0.508712000 |              |              |   |
| N           | -4.387264000 | -0.060488000 |   | C           | -4.087601000 | -2.466883000 | - |
| 0.059310000 |              |              |   | 0.064293000 |              |              |   |
| C           | -4.977274000 | -1.241518000 | - | O           | -4.427515000 | -3.552060000 | - |
| 0.143718000 |              |              |   | 0.505799000 |              |              |   |
| C           | -6.312918000 | -1.346284000 | - | N           | -2.880051000 | -2.180363000 |   |
| 0.530172000 |              |              |   | 0.506395000 |              |              |   |
| C           | -7.039140000 | -0.171858000 | - | N           | -1.757261000 | -2.944155000 |   |
| 0.715318000 |              |              |   | 0.331026000 |              |              |   |
| C           | -4.272126000 | 2.356813000  | - | N           | -1.975979000 | 2.981558000  |   |
| 0.112885000 |              |              |   | 0.272966000 |              |              |   |

|             |              |              |   |             |              |              |   |
|-------------|--------------|--------------|---|-------------|--------------|--------------|---|
| C           | -0.905282000 | 2.574649000  |   | C           | 5.479601000  | 0.709243000  | - |
| 0.856189000 |              |              |   | 0.568440000 |              |              |   |
| C           | -0.711868000 | -2.472696000 |   | C           | 5.433306000  | -0.634117000 | - |
| 0.909709000 |              |              |   | 0.796437000 |              |              |   |
| C           | 0.429644000  | 3.091458000  |   | H           | -6.922664000 | 1.993310000  | - |
| 0.586601000 |              |              |   | 0.734856000 |              |              |   |
| C           | 0.641986000  | -2.978574000 |   | H           | -6.752672000 | -2.321619000 | - |
| 0.703522000 |              |              |   | 0.693958000 |              |              |   |
| C           | 0.711776000  | 4.020193000  | - | H           | -8.081737000 | -0.215707000 | - |
| 0.433374000 |              |              |   | 1.008221000 |              |              |   |
| C           | 2.019118000  | 4.325402000  | - | H           | -2.900705000 | 1.247010000  |   |
| 0.765365000 |              |              |   | 0.858666000 |              |              |   |
| C           | 3.086186000  | 3.710468000  | - | H           | -2.762611000 | -1.218915000 |   |
| 0.088985000 |              |              |   | 0.809827000 |              |              |   |
| C           | 2.823599000  | 2.835204000  |   | H           | -0.944128000 | 1.724920000  |   |
| 0.966988000 |              |              |   | 1.547093000 |              |              |   |
| C           | 1.504985000  | 2.530819000  |   | H           | -0.788489000 | -1.590256000 |   |
| 1.287511000 |              |              |   | 1.554115000 |              |              |   |
| C           | 1.675701000  | -2.421207000 |   | H           | -0.104461000 | 4.467156000  | - |
| 1.471793000 |              |              |   | 0.989319000 |              |              |   |
| C           | 3.003166000  | -2.752269000 |   | H           | 2.243776000  | 5.013312000  | - |
| 1.230361000 |              |              |   | 1.572662000 |              |              |   |
| C           | 3.313639000  | -3.641442000 |   | H           | 3.621616000  | 2.359068000  |   |
| 0.204206000 |              |              |   | 1.520162000 |              |              |   |
| C           | 2.294748000  | -4.238995000 | - | H           | 1.312616000  | 1.817213000  |   |
| 0.545659000 |              |              |   | 2.082402000 |              |              |   |
| C           | 0.968940000  | -3.911931000 | - | H           | 1.438943000  | -1.702162000 |   |
| 0.295084000 |              |              |   | 2.249482000 |              |              |   |
| O           | 4.333622000  | 4.018714000  | - | H           | 3.804245000  | -2.313229000 |   |
| 0.551044000 |              |              |   | 1.812995000 |              |              |   |
| C           | 5.470193000  | 3.323403000  | - | H           | 2.549441000  | -4.946902000 | - |
| 0.016159000 |              |              |   | 1.326967000 |              |              |   |
| C           | 5.487845000  | 1.896432000  | - | H           | 0.178763000  | -4.351529000 | - |
| 0.328480000 |              |              |   | 0.892815000 |              |              |   |
| O           | 4.640924000  | -3.941491000 | - | H           | 4.643830000  | -3.476423000 | - |
| 0.043234000 |              |              |   | 2.081589000 |              |              |   |
| C           | 5.226722000  | -3.270966000 | - | H           | 6.209906000  | -3.727411000 | - |
| 1.177069000 |              |              |   | 1.302314000 |              |              |   |
| C           | 5.355954000  | -1.827787000 | - | H           | 5.535363000  | 3.475916000  |   |
| 0.988582000 |              |              |   | 1.066499000 |              |              |   |

H           6.329460000       3.819924000       -  
0.468276000

.....  
**Complex 5·Cu(ClO<sub>4</sub>)<sub>2</sub>**  
 .....

C           1.204020000       -5.489535000       -  
1.089960000

C           5.095856000       1.054237000       -  
0.552985000

C           1.163520000       -4.125902000       -  
0.822595000

C           5.999207000       2.102392000       -  
0.608976000

N           0.000062000       -3.479105000       -  
0.667773000

C           6.103532000       2.987991000  
0.477636000

C           -1.163421000       -4.125979000       -  
0.822045000

C           5.292339000       2.805072000  
1.609666000

C           -1.203918000       -5.489623000       -  
1.089389000

C           4.394472000       1.756861000  
1.653596000

C           0.000049000       -6.181051000       -  
1.199987000

C           -4.393190000       1.758153000  
1.653037000

C           2.392448000       -3.264002000       -  
0.827669000

C           -5.291326000       2.806142000  
1.609090000

O           3.378194000       -3.529996000       -  
1.457187000

C           -6.103925000       2.987709000  
0.477860000

N           2.211544000       -2.053392000       -  
0.078255000

C           -6.000776000       2.100959000       -  
0.607916000

C           -2.392499000       -3.264265000       -  
0.826740000

C           -5.097168000       1.053015000       -  
0.551894000

O           -3.378341000       -3.530583000       -  
1.456003000

O           6.948249000       4.043597000  
0.532210000

N           -2.211666000       -2.053543000       -  
0.077609000

C           7.812132000       4.298787000       -  
0.590848000

N           -3.190462000       -1.093777000       -  
0.282780000

C           8.614886000       5.476376000       -  
0.292303000

N           3.189884000       -1.093236000       -  
0.283792000

O           -6.948758000       4.043251000  
0.532335000

C           3.324715000       -0.228675000  
0.661424000

C           -7.813772000       4.297315000       -  
0.590098000

C           -3.324154000       -0.228183000  
0.661632000

C           -8.616206000       5.475221000       -  
0.291934000

C           4.277743000       0.859097000  
0.573908000

C           9.291433000       6.444437000       -  
0.074249000

C           -4.277616000       0.859255000  
0.574181000

C           -9.292508000       6.443522000       -  
0.074183000

|             |              |              |   |             |              |              |   |
|-------------|--------------|--------------|---|-------------|--------------|--------------|---|
| H           | 2.158360000  | -5.982707000 | - | H           | 8.459135000  | 3.433496000  | - |
| 1.219203000 |              |              |   | 0.766966000 |              |              |   |
| H           | -2.158277000 | -5.982870000 | - | H           | -8.460983000 | 3.431871000  | - |
| 1.218200000 |              |              |   | 0.764704000 |              |              |   |
| H           | 0.000039000  | -7.245697000 | - | H           | -7.214804000 | 4.464682000  | - |
| 1.397440000 |              |              |   | 1.490925000 |              |              |   |
| H           | 1.985945000  | -2.262148000 |   | H           | 9.889583000  | 7.304053000  |   |
| 0.907877000 |              |              |   | 0.123441000 |              |              |   |
| H           | -1.985216000 | -2.262014000 |   | H           | -9.890431000 | 7.303359000  |   |
| 0.908323000 |              |              |   | 0.123232000 |              |              |   |
| H           | 2.716453000  | -0.278345000 |   | Cu          | 0.000112000  | -1.515923000 | - |
| 1.567867000 |              |              |   | 0.408380000 |              |              |   |
| H           | -2.714535000 | -0.276567000 |   | O           | 0.000218000  | 0.446496000  | - |
| 1.567233000 |              |              |   | 0.594764000 |              |              |   |
| H           | 5.014701000  | 0.372946000  | - | Cl          | -0.000307000 | 1.023975000  | - |
| 1.391298000 |              |              |   | 2.049354000 |              |              |   |
| H           | 6.611294000  | 2.223220000  | - | O           | -0.000979000 | -0.142521000 | - |
| 1.492780000 |              |              |   | 2.971629000 |              |              |   |
| H           | 5.387823000  | 3.499541000  |   | O           | 1.220817000  | 1.836080000  | - |
| 2.435910000 |              |              |   | 2.200028000 |              |              |   |
| H           | 3.772064000  | 1.624722000  |   | O           | -1.221206000 | 1.836626000  | - |
| 2.532510000 |              |              |   | 2.198928000 |              |              |   |
| H           | -3.769677000 | 1.627091000  |   | Cl          | 0.000945000  | -2.161453000 |   |
| 2.531330000 |              |              |   | 2.876123000 |              |              |   |
| H           | -5.385925000 | 3.501478000  |   | O           | -0.000799000 | -0.999622000 |   |
| 2.434707000 |              |              |   | 1.895239000 |              |              |   |
| H           | -6.613951000 | 2.220725000  | - | O           | -0.001210000 | -1.658248000 |   |
| 1.491112000 |              |              |   | 4.257743000 |              |              |   |
| H           | -5.016925000 | 0.370832000  | - | O           | 1.228907000  | -2.973589000 |   |
| 1.389570000 |              |              |   | 2.598443000 |              |              |   |
| H           | 7.212258000  | 4.467071000  | - | O           | -1.222816000 | -2.979045000 |   |
| 1.490898000 |              |              |   | 2.596384000 |              |              |   |

.....  
**Complex 7·Hg<sup>2+</sup> (left sided alkyne)**  
.....

|             |              |              |   |             |              |              |   |
|-------------|--------------|--------------|---|-------------|--------------|--------------|---|
| C           | -6.411018000 | 1.058991000  | - | C           | -4.983317000 | -1.238139000 | - |
| 0.600764000 |              |              |   | 0.164554000 |              |              |   |
| C           | -5.075605000 | 1.070102000  | - | C           | -6.315238000 | -1.346107000 | - |
| 0.198915000 |              |              |   | 0.562751000 |              |              |   |
| N           | -4.396116000 | -0.055525000 |   | C           | -7.040399000 | -0.173216000 | - |
| 0.037300000 |              |              |   | 0.761599000 |              |              |   |

|             |              |              |   |             |              |              |   |
|-------------|--------------|--------------|---|-------------|--------------|--------------|---|
| C           | -4.279191000 | 2.359873000  | - | C           | 2.289946000  | -4.238499000 | - |
| 0.149754000 |              |              |   | 0.491130000 |              |              |   |
| O           | -4.670497000 | 3.390413000  | - | C           | 0.963181000  | -3.906217000 | - |
| 0.672243000 |              |              |   | 0.252744000 |              |              |   |
| N           | -3.083327000 | 2.192166000  |   | O           | 4.333937000  | 3.993995000  | - |
| 0.488985000 |              |              |   | 0.522949000 |              |              |   |
| C           | -4.092497000 | -2.461558000 | - | C           | 5.462704000  | 3.302041000  |   |
| 0.071139000 |              |              |   | 0.028700000 |              |              |   |
| O           | -4.425556000 | -3.549338000 | - | C           | 5.487110000  | 1.874390000  | - |
| 0.510835000 |              |              |   | 0.282977000 |              |              |   |
| N           | -2.890309000 | -2.170108000 |   | O           | 4.633761000  | -3.942616000 |   |
| 0.509563000 |              |              |   | 0.026333000 |              |              |   |
| N           | -1.764917000 | -2.931732000 |   | C           | 5.228564000  | -3.297231000 | - |
| 0.346299000 |              |              |   | 1.115135000 |              |              |   |
| N           | -1.985630000 | 2.981789000  |   | C           | 5.375520000  | -1.852043000 | - |
| 0.255415000 |              |              |   | 0.944190000 |              |              |   |
| C           | -0.921813000 | 2.575914000  |   | C           | 5.485911000  | 0.687413000  | - |
| 0.851488000 |              |              |   | 0.524281000 |              |              |   |
| C           | -0.723959000 | -2.454885000 |   | C           | 5.447963000  | -0.656399000 | - |
| 0.928321000 |              |              |   | 0.753497000 |              |              |   |
| C           | 0.417436000  | 3.085347000  |   | H           | -6.925008000 | 1.991818000  | - |
| 0.588327000 |              |              |   | 0.793754000 |              |              |   |
| C           | 0.631325000  | -2.962381000 |   | H           | -6.753076000 | -2.322577000 | - |
| 0.734309000 |              |              |   | 0.724878000 |              |              |   |
| C           | 0.710763000  | 4.007452000  | - | H           | -8.080216000 | -0.219494000 | - |
| 0.434424000 |              |              |   | 1.063795000 |              |              |   |
| C           | 2.021779000  | 4.306323000  | - | H           | -2.922384000 | 1.257700000  |   |
| 0.757889000 |              |              |   | 0.850639000 |              |              |   |
| C           | 3.080851000  | 3.691243000  | - | H           | -2.777729000 | -1.207272000 |   |
| 0.069735000 |              |              |   | 0.810481000 |              |              |   |
| C           | 2.807338000  | 2.821791000  |   | H           | -0.969824000 | 1.732378000  |   |
| 0.987921000 |              |              |   | 1.549345000 |              |              |   |
| C           | 1.485067000  | 2.524148000  |   | H           | -0.805302000 | -1.567997000 |   |
| 1.300203000 |              |              |   | 1.565893000 |              |              |   |
| C           | 1.660885000  | -2.398683000 |   | H           | -0.099569000 | 4.454880000  | - |
| 1.503360000 |              |              |   | 0.998522000 |              |              |   |
| C           | 2.989471000  | -2.734446000 |   | H           | 2.255094000  | 4.989957000  | - |
| 1.273962000 |              |              |   | 1.566353000 |              |              |   |
| C           | 3.304491000  | -3.635164000 |   | H           | 3.599090000  | 2.345984000  |   |
| 0.259644000 |              |              |   | 1.550397000 |              |              |   |



|             |             |              |   |             |             |              |   |
|-------------|-------------|--------------|---|-------------|-------------|--------------|---|
| H           | 1.283889000 | 1.815862000  |   | H           | 5.513341000 | 3.454109000  |   |
| 2.097629000 |             |              |   | 1.112173000 |             |              |   |
| H           | 1.420346000 | -1.671899000 |   | H           | 6.328462000 | 3.798388000  | - |
| 2.272604000 |             |              |   | 0.411207000 |             |              |   |
| H           | 3.787308000 | -2.291740000 |   | H           | 4.644255000 | -3.505373000 | - |
| 1.858355000 |             |              |   | 2.018125000 |             |              |   |
| H           | 2.547926000 | -4.956081000 | - | H           | 6.205404000 | -3.768433000 | - |
| 1.262476000 |             |              |   | 1.233621000 |             |              |   |
| H           | 0.176045000 | -4.351143000 | - | Hg          | 8.595388000 | -0.964937000 | - |
| 0.850482000 |             |              |   | 2.482498000 |             |              |   |

.....  
 Complex **7**·**Hg**<sup>2+</sup> (right sided alkyne)  
 .....

|             |              |              |   |             |              |              |   |
|-------------|--------------|--------------|---|-------------|--------------|--------------|---|
| C           | -6.426141000 | 1.054363000  | - | C           | 3.064271000  | 3.692070000  | - |
| 0.560272000 |              |              |   | 0.111641000 |              |              |   |
| C           | -5.087574000 | 1.064437000  | - | C           | 2.805099000  | 2.820389000  |   |
| 0.169086000 |              |              |   | 0.947642000 |              |              |   |
| N           | -4.404661000 | -0.061840000 |   | C           | 1.487010000  | 2.518633000  |   |
| 0.053724000 |              |              |   | 1.274020000 |              |              |   |
| C           | -4.991769000 | -1.243846000 | - | C           | 1.661490000  | -2.409540000 |   |
| 0.151799000 |              |              |   | 1.476331000 |              |              |   |
| C           | -6.326647000 | -1.350816000 | - | C           | 2.990072000  | -2.740443000 |   |
| 0.540271000 |              |              |   | 1.240359000 |              |              |   |
| C           | -7.055033000 | -0.177581000 | - | C           | 3.304725000  | -3.630136000 |   |
| 0.724925000 |              |              |   | 0.216111000 |              |              |   |
| C           | -4.292156000 | 2.354594000  | - | C           | 2.289278000  | -4.227867000 | - |
| 0.117785000 |              |              |   | 0.538055000 |              |              |   |
| O           | -4.688089000 | 3.387983000  | - | C           | 0.962372000  | -3.900754000 | - |
| 0.630889000 |              |              |   | 0.292994000 |              |              |   |
| N           | -3.091032000 | 2.184313000  |   | O           | 4.311434000  | 4.000321000  | - |
| 0.510895000 |              |              |   | 0.578124000 |              |              |   |
| C           | -4.098801000 | -2.466934000 | - | C           | 5.451104000  | 3.329627000  | - |
| 0.073103000 |              |              |   | 0.024613000 |              |              |   |
| O           | -4.434701000 | -3.552502000 | - | C           | 5.497173000  | 1.899405000  | - |
| 0.516178000 |              |              |   | 0.326299000 |              |              |   |
| N           | -2.892446000 | -2.177330000 |   | O           | 4.633817000  | -3.931960000 | - |
| 0.499362000 |              |              |   | 0.023617000 |              |              |   |
| N           | -1.767413000 | -2.937582000 |   | C           | 5.224924000  | -3.270716000 | - |
| 0.325787000 |              |              |   | 1.158533000 |              |              |   |
| N           | -1.995608000 | 2.974457000  |   | C           | 5.368033000  | -1.827989000 | - |
| 0.269275000 |              |              |   | 0.972515000 |              |              |   |
| C           | -0.925377000 | 2.566476000  |   | C           | 5.503214000  | 0.709738000  | - |
| 0.852081000 |              |              |   | 0.560168000 |              |              |   |
| C           | -0.724428000 | -2.463830000 |   | C           | 5.455048000  | -0.634534000 | - |
| 0.906802000 |              |              |   | 0.782988000 |              |              |   |
| C           | 0.410303000  | 3.078093000  |   | H           | -6.942952000 | 1.987810000  | - |
| 0.574788000 |              |              |   | 0.742465000 |              |              |   |
| C           | 0.631006000  | -2.967494000 |   | H           | -6.764377000 | -2.326740000 | - |
| 0.704227000 |              |              |   | 0.705938000 |              |              |   |
| C           | 0.689808000  | 4.001544000  | - | H           | -8.097158000 | -0.223196000 | - |
| 0.450590000 |              |              |   | 1.019164000 |              |              |   |
| C           | 1.996259000  | 4.304263000  | - | H           | -2.926486000 | 1.247849000  |   |
| 0.788212000 |              |              |   | 0.865695000 |              |              |   |

|             |              |              |             |             |              |
|-------------|--------------|--------------|-------------|-------------|--------------|
| H           | -2.778649000 | -1.215929000 | H           | 3.788539000 | -2.302048000 |
| 0.804341000 |              |              | 1.827125000 |             |              |
| H           | -0.964995000 | 1.720460000  | H           | 2.546815000 | -4.936735000 |
| 1.547419000 |              |              | 1.317544000 |             | -            |
| H           | -0.804419000 | -1.581741000 | H           | 0.174719000 | -4.341130000 |
| 1.551248000 |              |              | 0.893447000 |             | -            |
| H           | -0.127967000 | 4.447174000  | -           | H           | 5.500883000  |
| 1.005243000 |              |              |             | 1.057798000 | 3.489984000  |
| H           | 2.218891000  | 4.989247000  | -           | H           | 6.307310000  |
| 1.598532000 |              |              |             | 0.469961000 | 3.837244000  |
| H           | 3.604237000  | 2.345460000  | -           | H           | 4.640193000  |
| 1.500398000 |              |              |             | 2.063049000 | -3.470777000 |
| H           | 1.296500000  | 1.808586000  | -           | H           | 6.203954000  |
| 2.072495000 |              |              |             | 1.284356000 | -3.735932000 |
| H           | 1.421348000  | -1.691006000 | -           | Hg          | 9.095788000  |
| 2.253437000 |              |              |             | 0.092458000 | 1.608142000  |

\*\*\*\*\*

## References:

1. C.-B. Huang, H.-R. Li, Y. Luo and L. Xu, *Dalton Trans.*, 2014, **43**, 8102–8108
2. A. Mondal, A. Roy Chowdhury, S. Bhuyan, S. K. Mukhopadhyaye and P. Banerjee, *Dalton Trans.*, 2019, **48**, 4375–4386
3. M. Kaur, M. J. Cho and D. H. Choi, *Dyes and Pigments*, 2016, **125**, 1-7
4. M. Kaur, Y. H. Ahn, K. Choi, M. J. Cho and D. H. Choi, *Org. Biomol. Chem.*, 2015, **13**, 7149–7153
5. G. Li, L. Bai, F. Tao, A. Deng and L. Wang, *Analyst*, 2018, **143**, 5395–5403
6. J. Dong, J. Hu, H. Baigudea and H. Zhang, *Dalton Trans.*, 2018, **47**, 314–322
7. S. Lal, K. Prakash, N. Khera, Drashya, S. Singh, A. Singh, S. Hooda and R. Chandra, *J. Mol. Str.*, 2020, **1211**, 128091.
8. P. Kaur, S. Kaura and K. Singh, *Org. Biomol. Chem.*, 2012, **10**, 1497–1501.
9. Y. Liu, J. Hua, Q. Tenga and H. Zhang, *Sensors and Actuators B*, 2017, **238**, 166–174.

10. S. Zhang, Q. Niu, L. Lan and T. Li, *Sensors and Actuators B*, 2017, **240**, 793–800.
11. C. S. M. Park, M. H. Kim, J. I. Choe, K. T. No and S.K. Chang, *J. Org. Chem.* 2007, **72**, 3550-3553.
12. Y. W. Sie, C. F. Wan and A. T. Wu, *RSC Adv.*, 2017, **7**, 2460–2465.
